# Supplementary material
Source: publisher site journal article supplement (https://www.dovepress.com/article/supplementary_file/610625/610625%20Supplementary%20Material.docx)
Supplement: Supplementary file 1 [file 610625%20Supplementary%20Material.docx]

**Supplementary material**

**
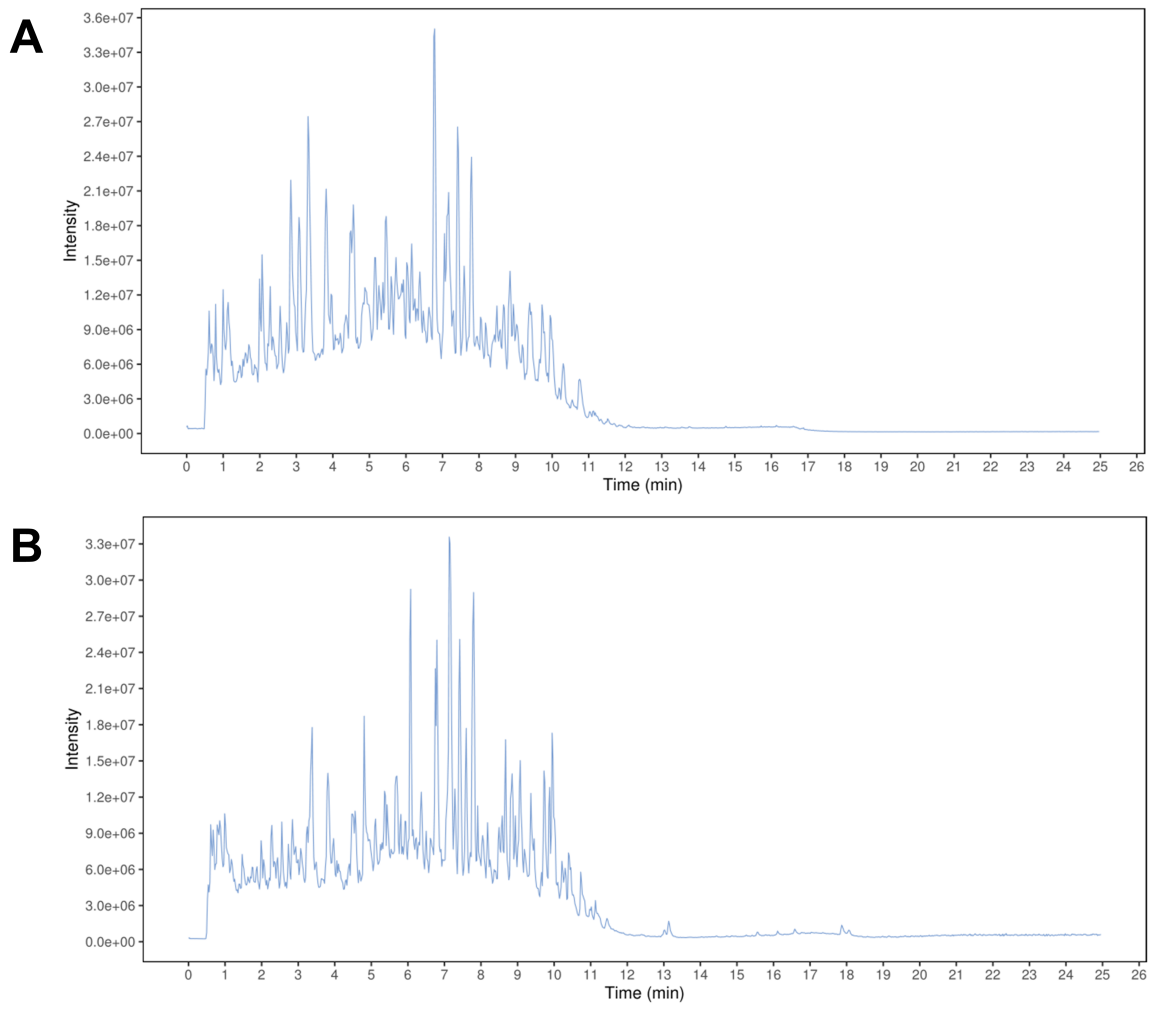
**

**Supplementary Figures S1. The TIC diagram obtained by the chromatographic analysis of Xiaoer Fengreqing by UHPLC-QTOF-MS. (A) Negative ion mode. (B) Positive ion mode.**

**
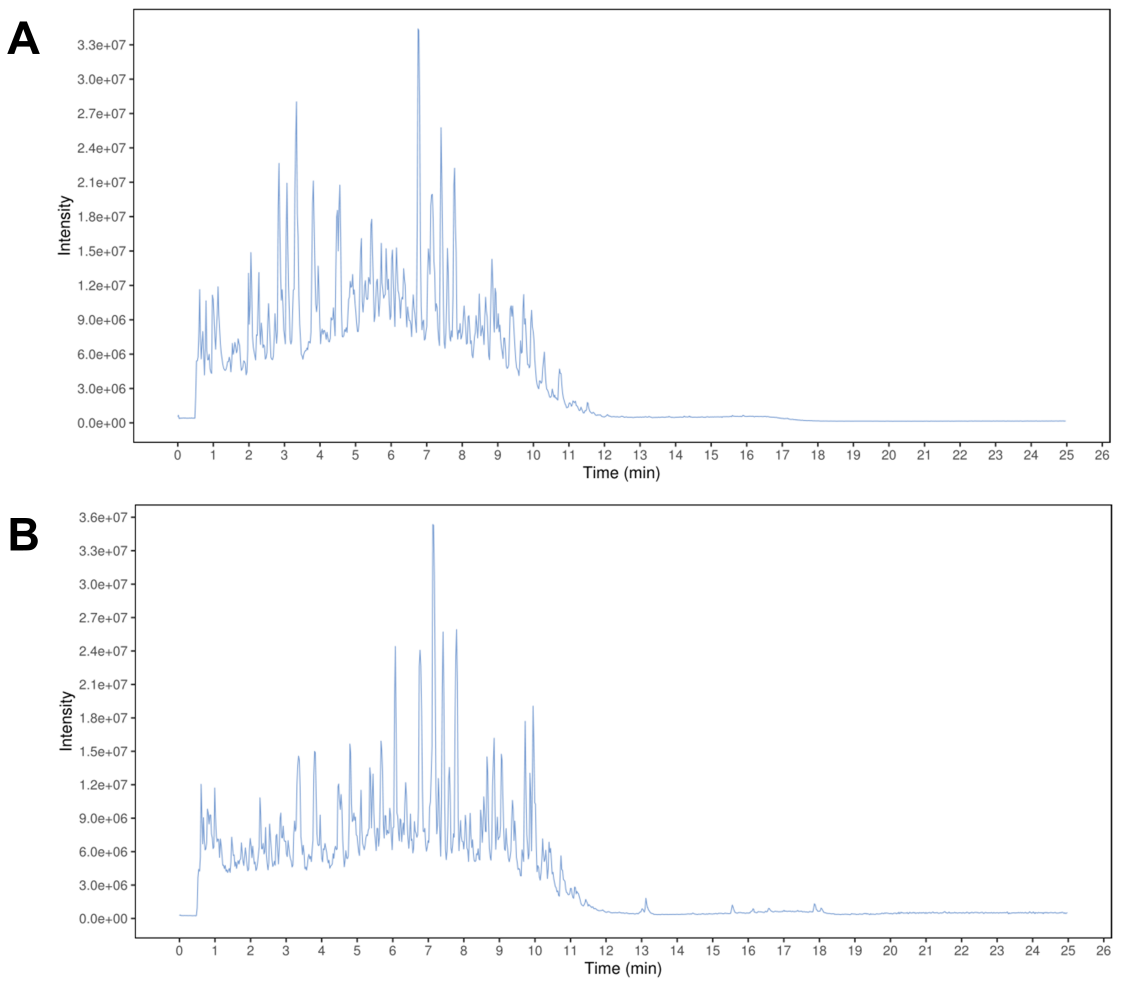
**

**Supplementary Figures S2. The second TIC diagram obtained by the chromatographic analysis of Xiaoer Fengreqing by UHPLC-QTOF-MS. (A) Negative ion mode. (B) Positive ion mode;**

**
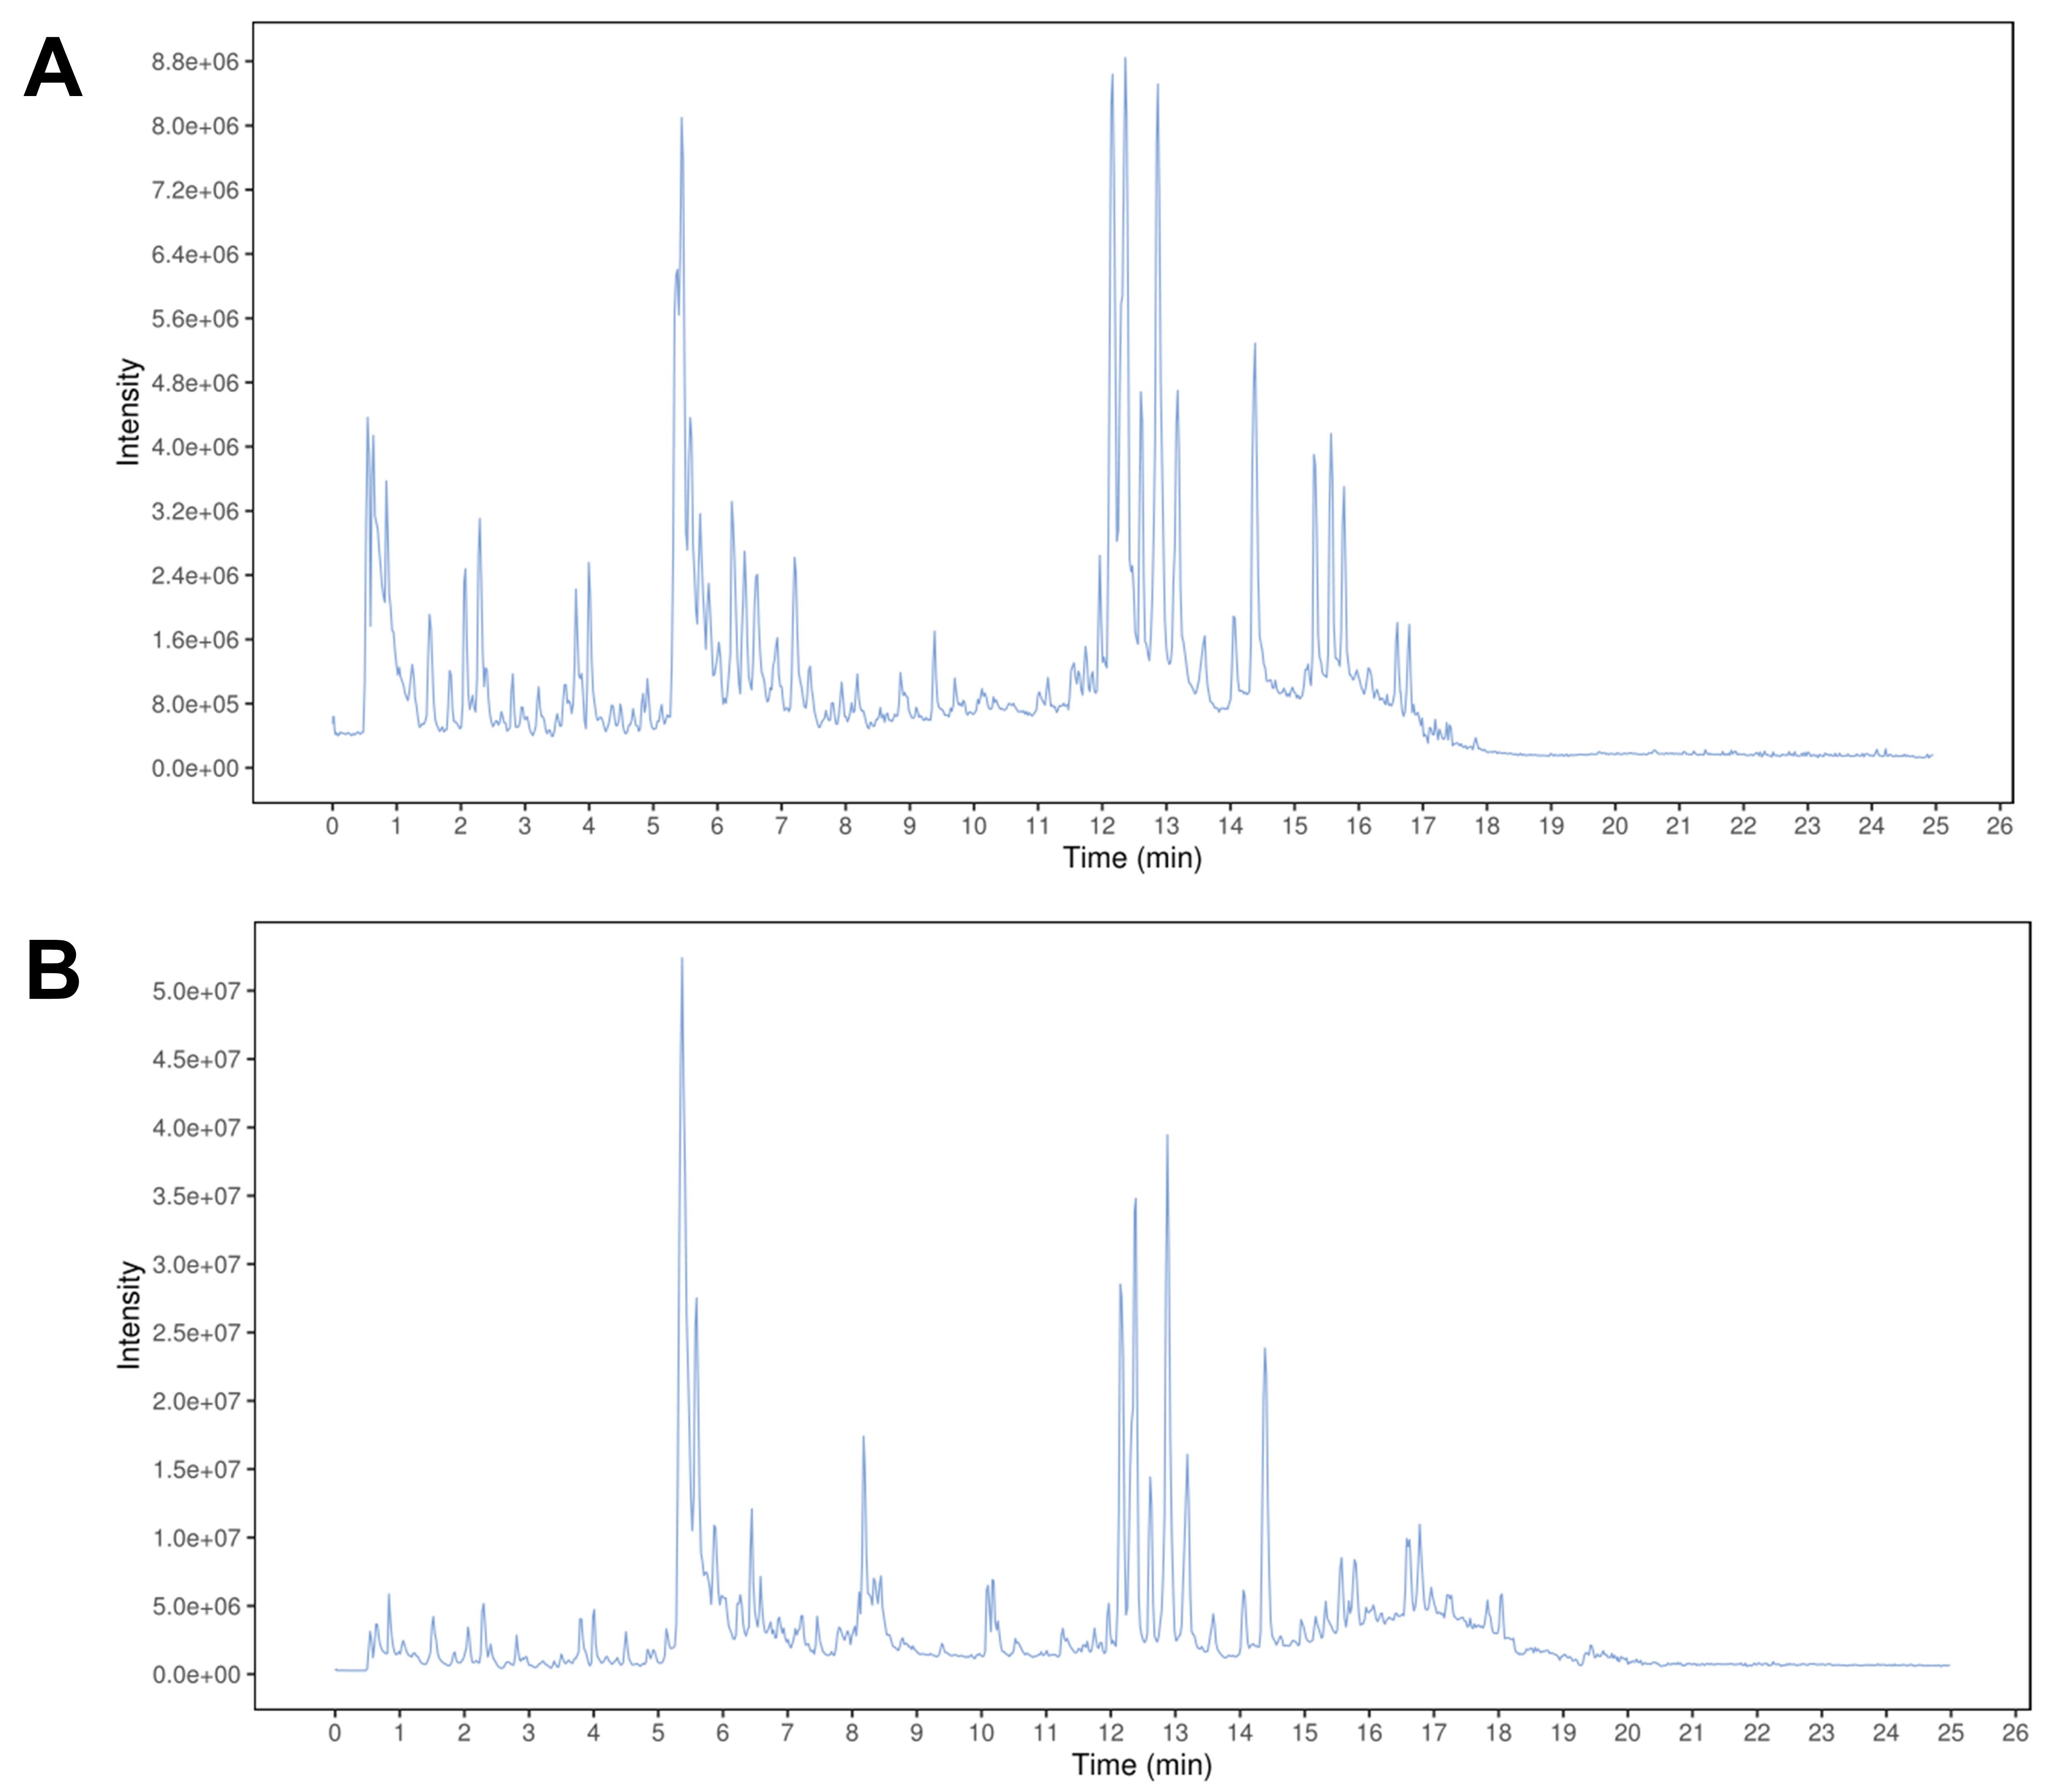
**

**Supplementary Figures S3. The TIC diagram of serum sample1 (blank control). (A) Negative ion mode. (B) Positive ion mode.**

**
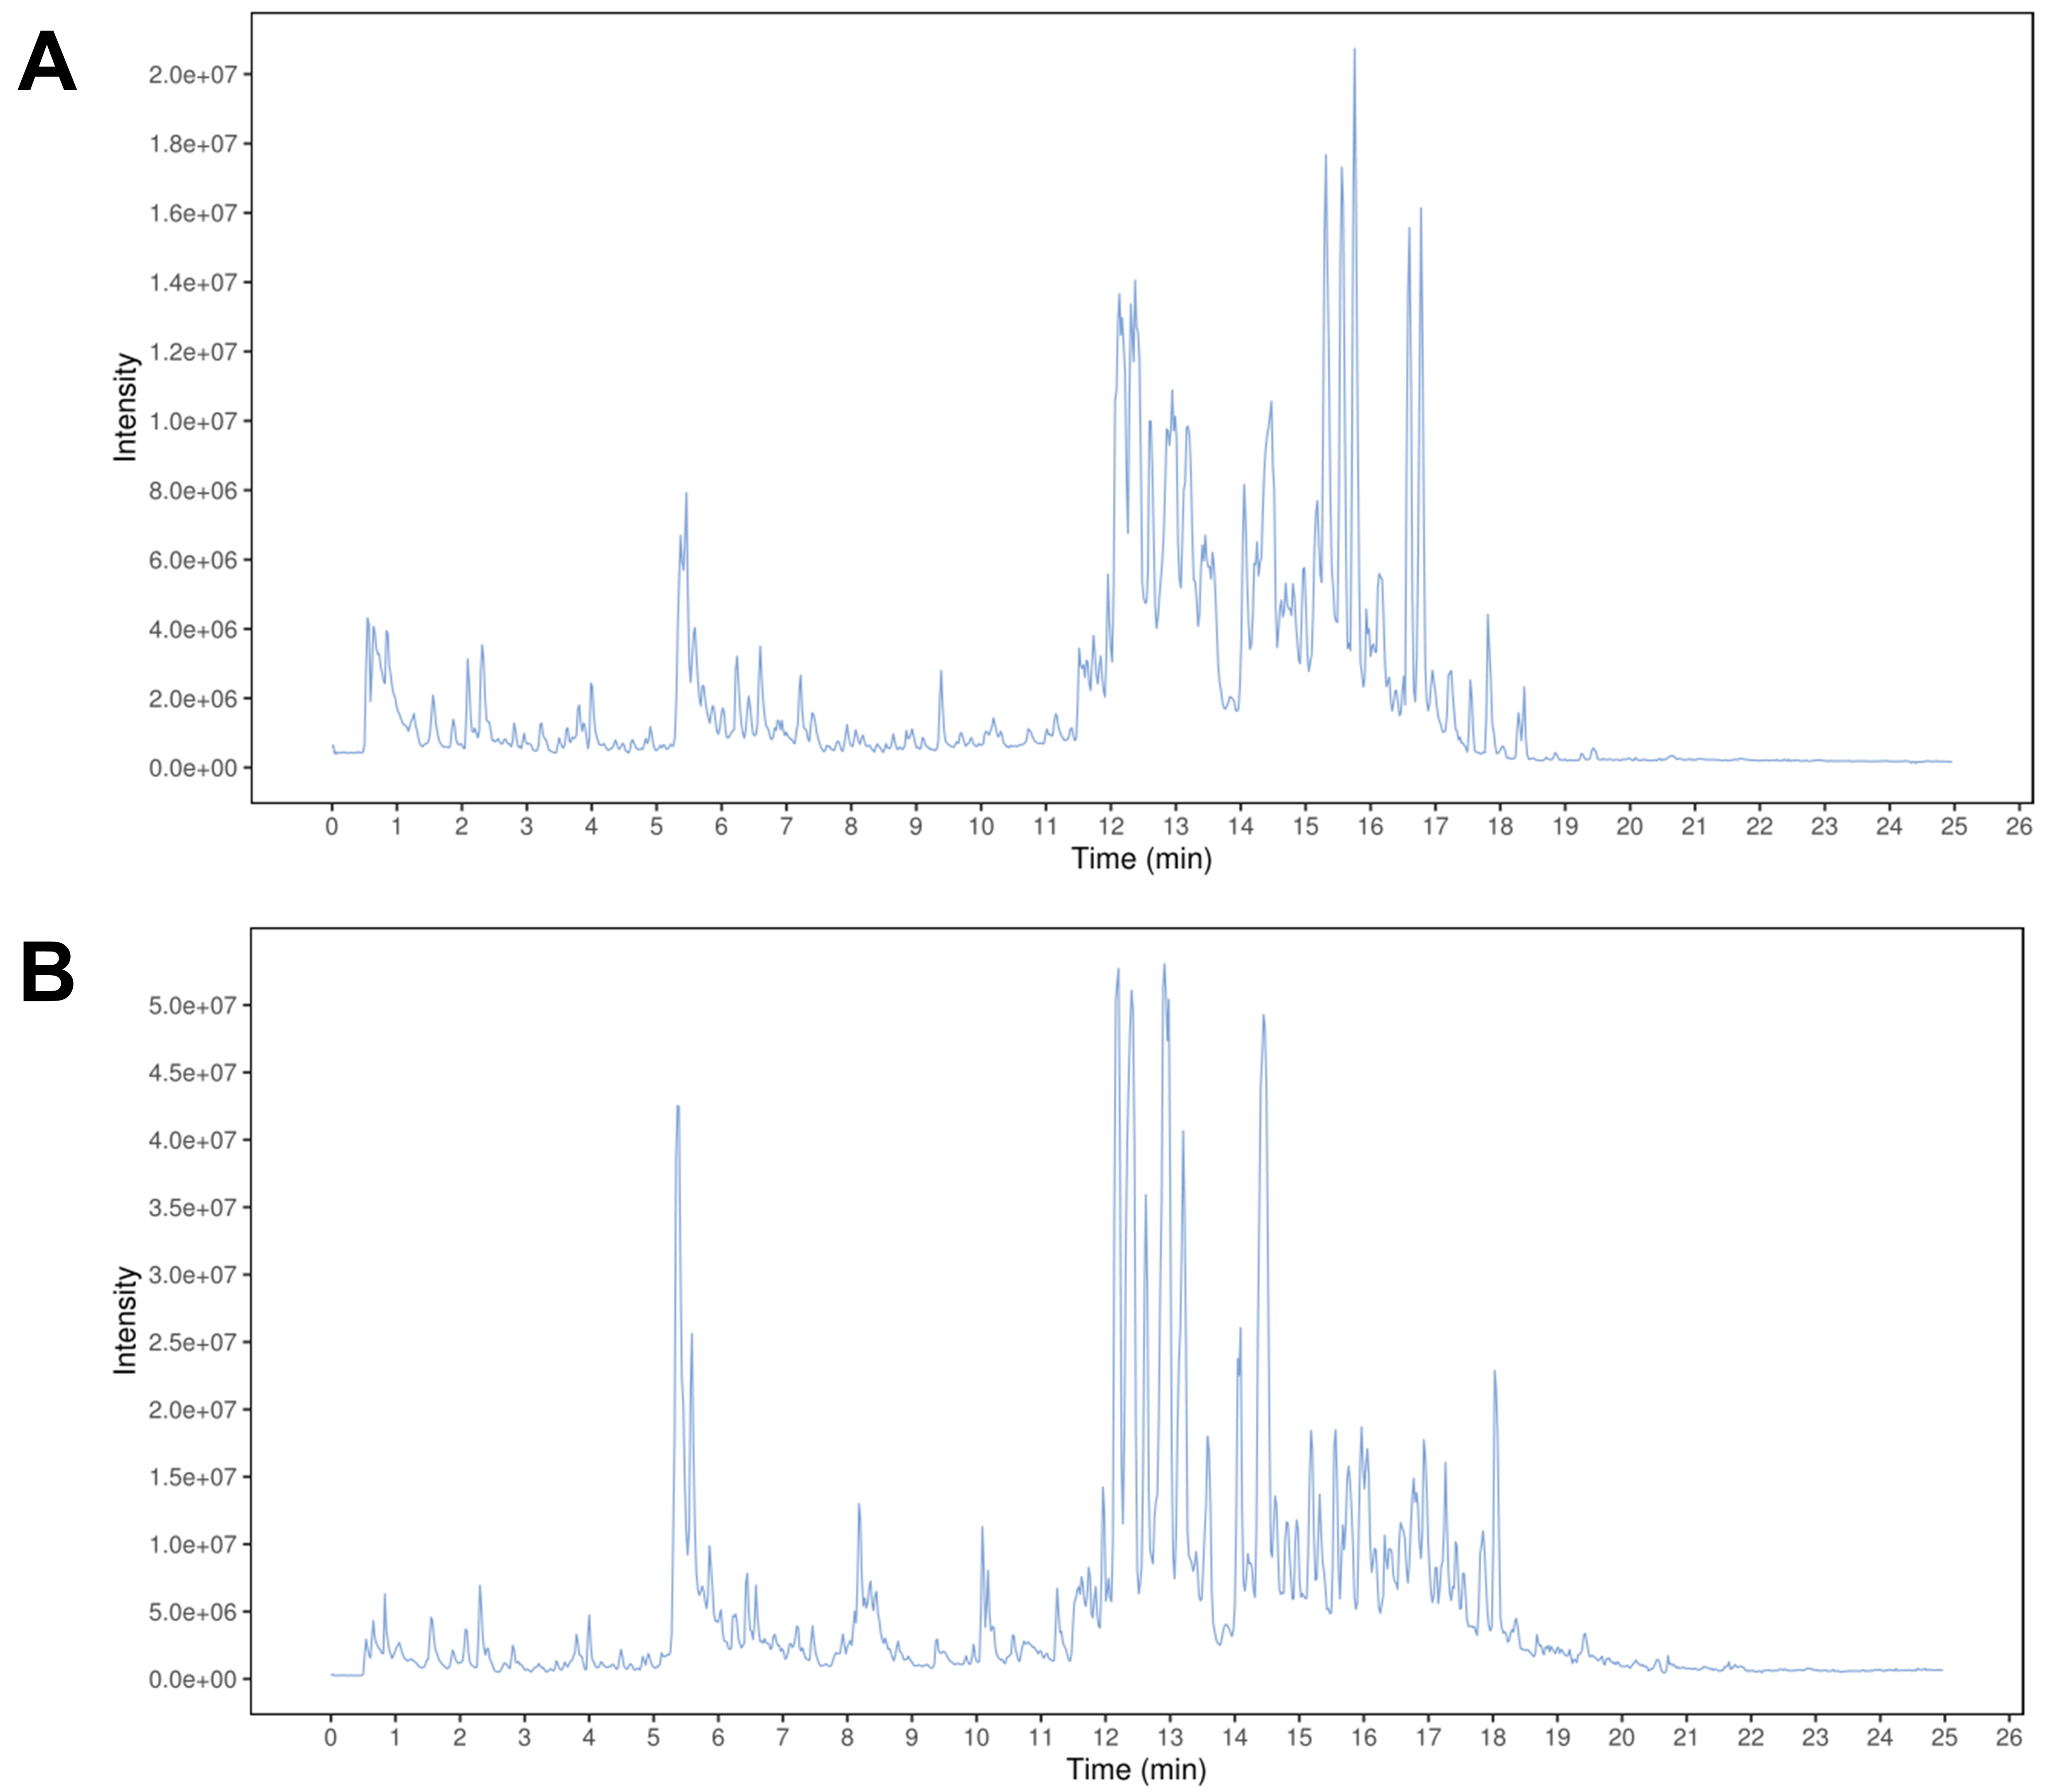
**

**Supplementary Figures S4. The second TIC diagram of serum sample1 (blank control). (A) Negative ion mode. (B) Positive ion mode.**

**
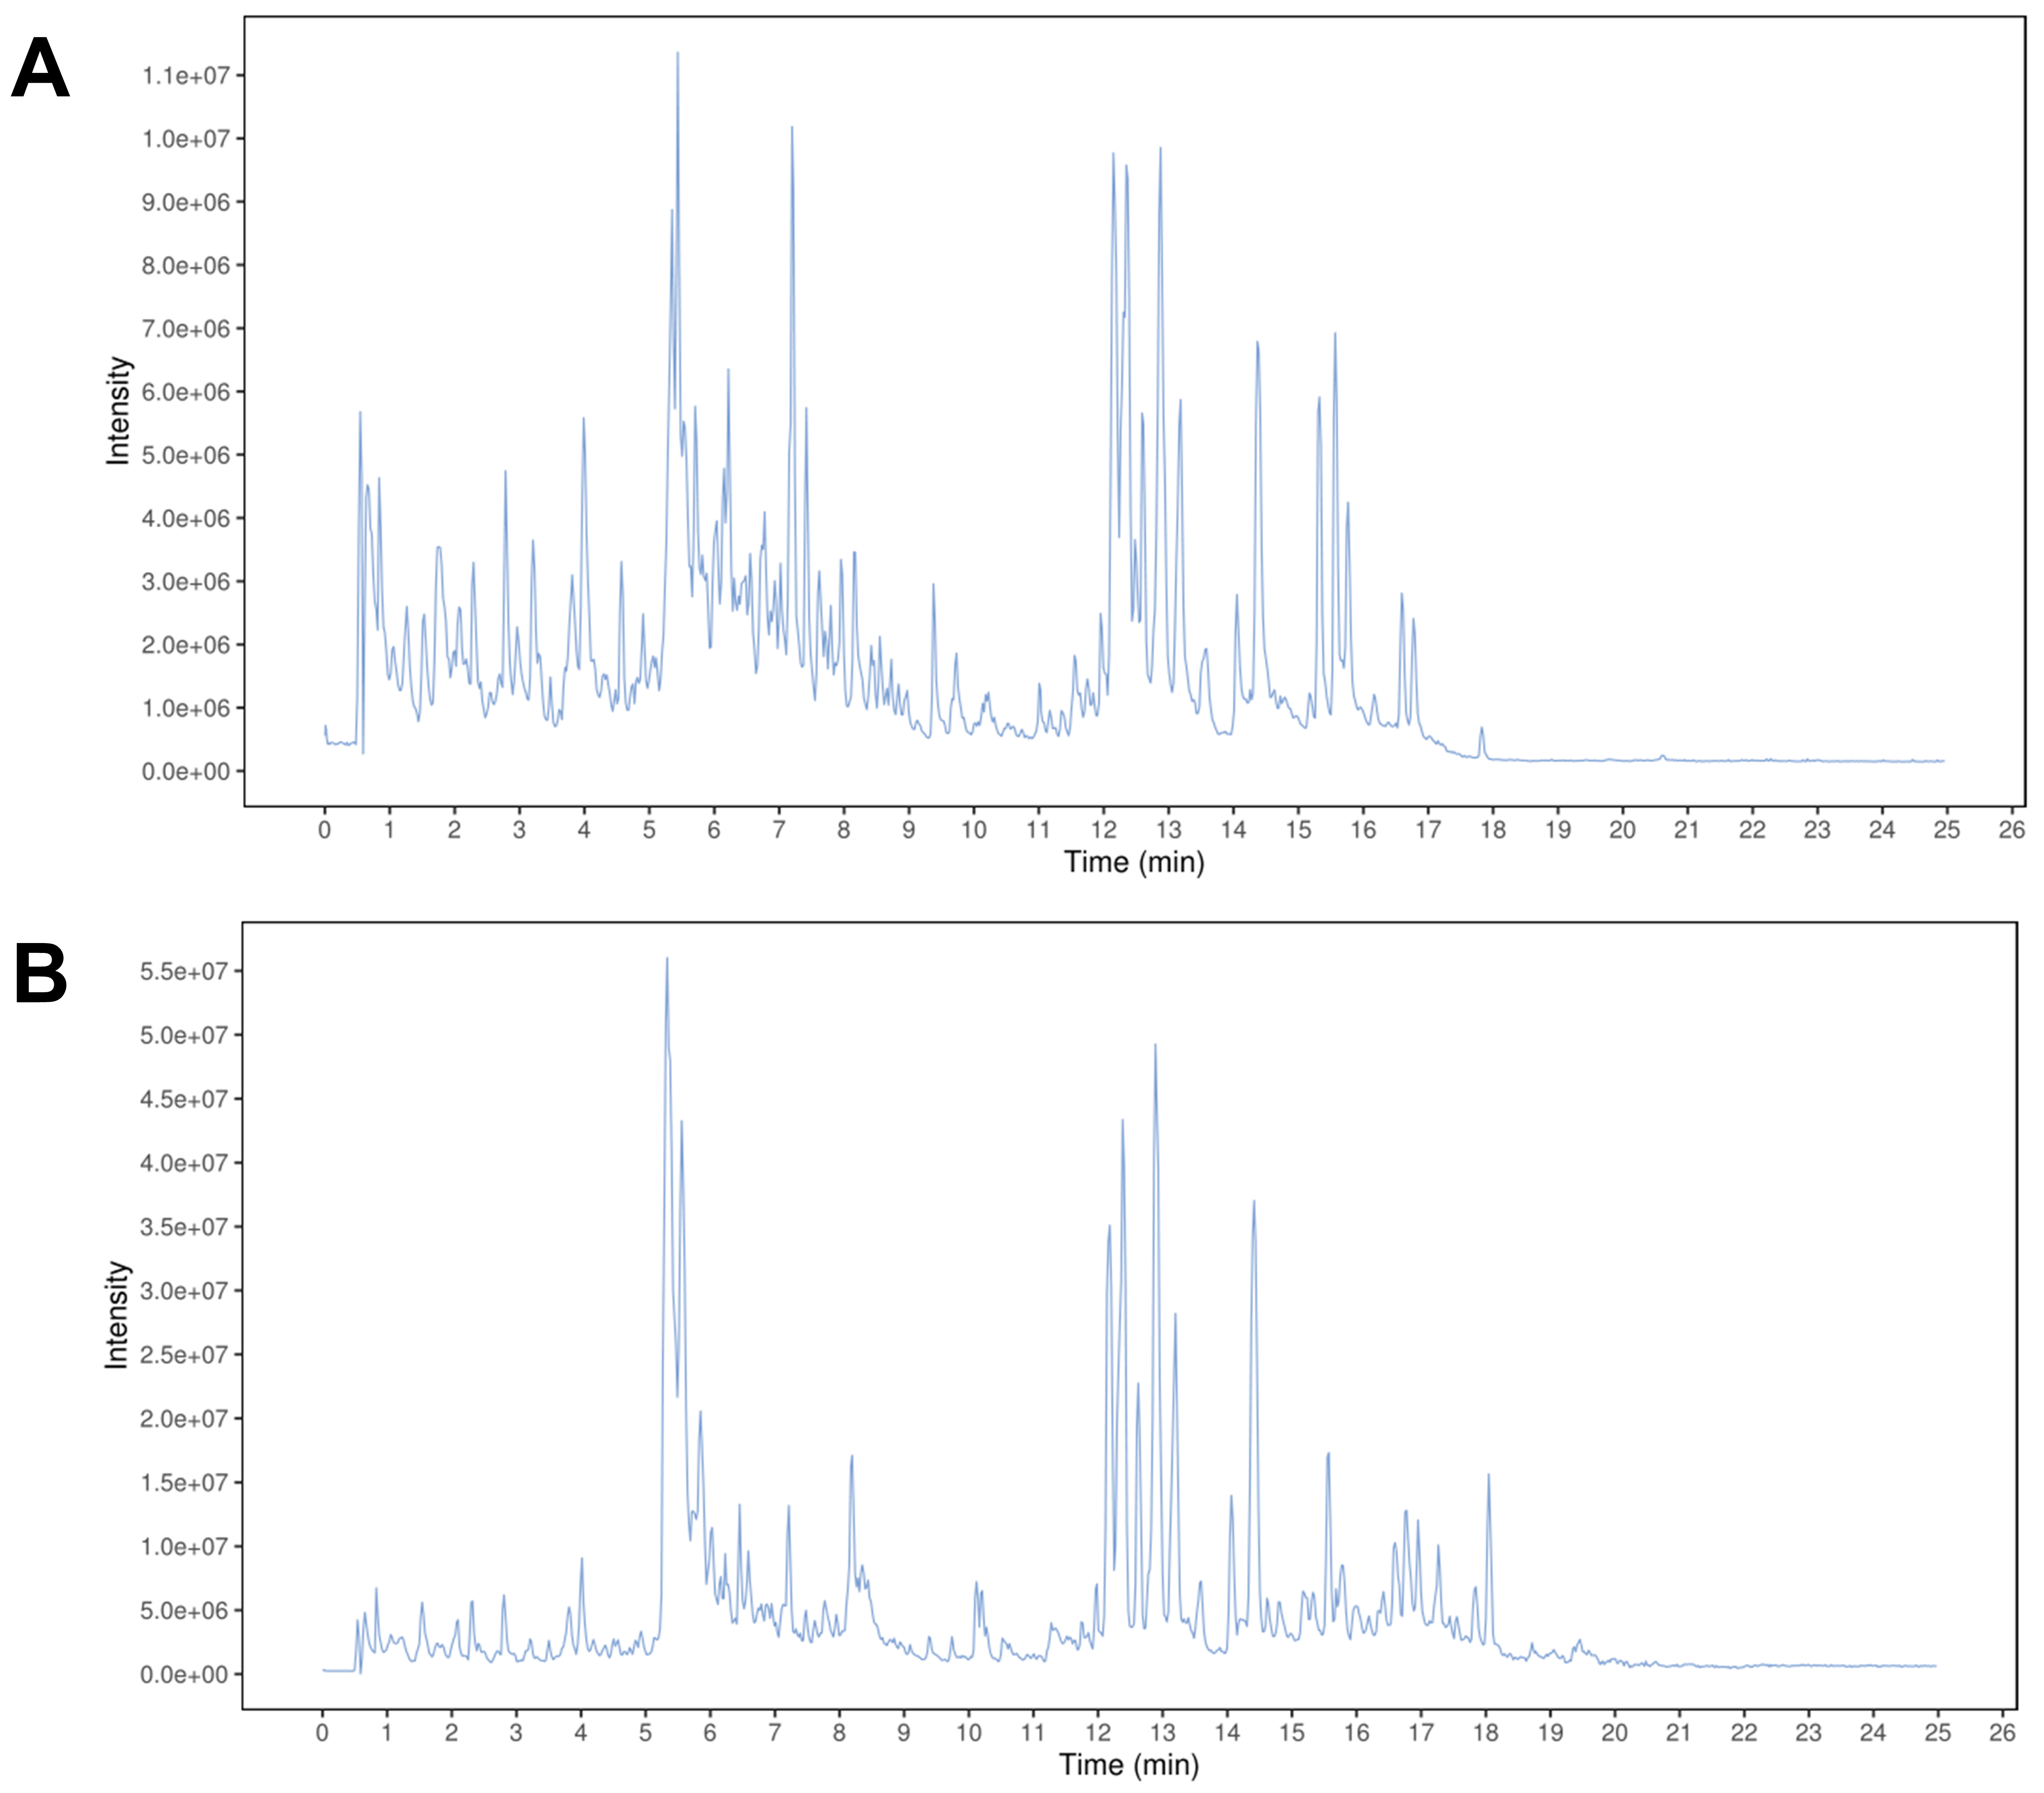
**

**Supplementary Figures S5. The TIC diagram of serum sample1 (normal dose drug treatment). (A) Negative ion mode. (B) Positive ion mode.**

**
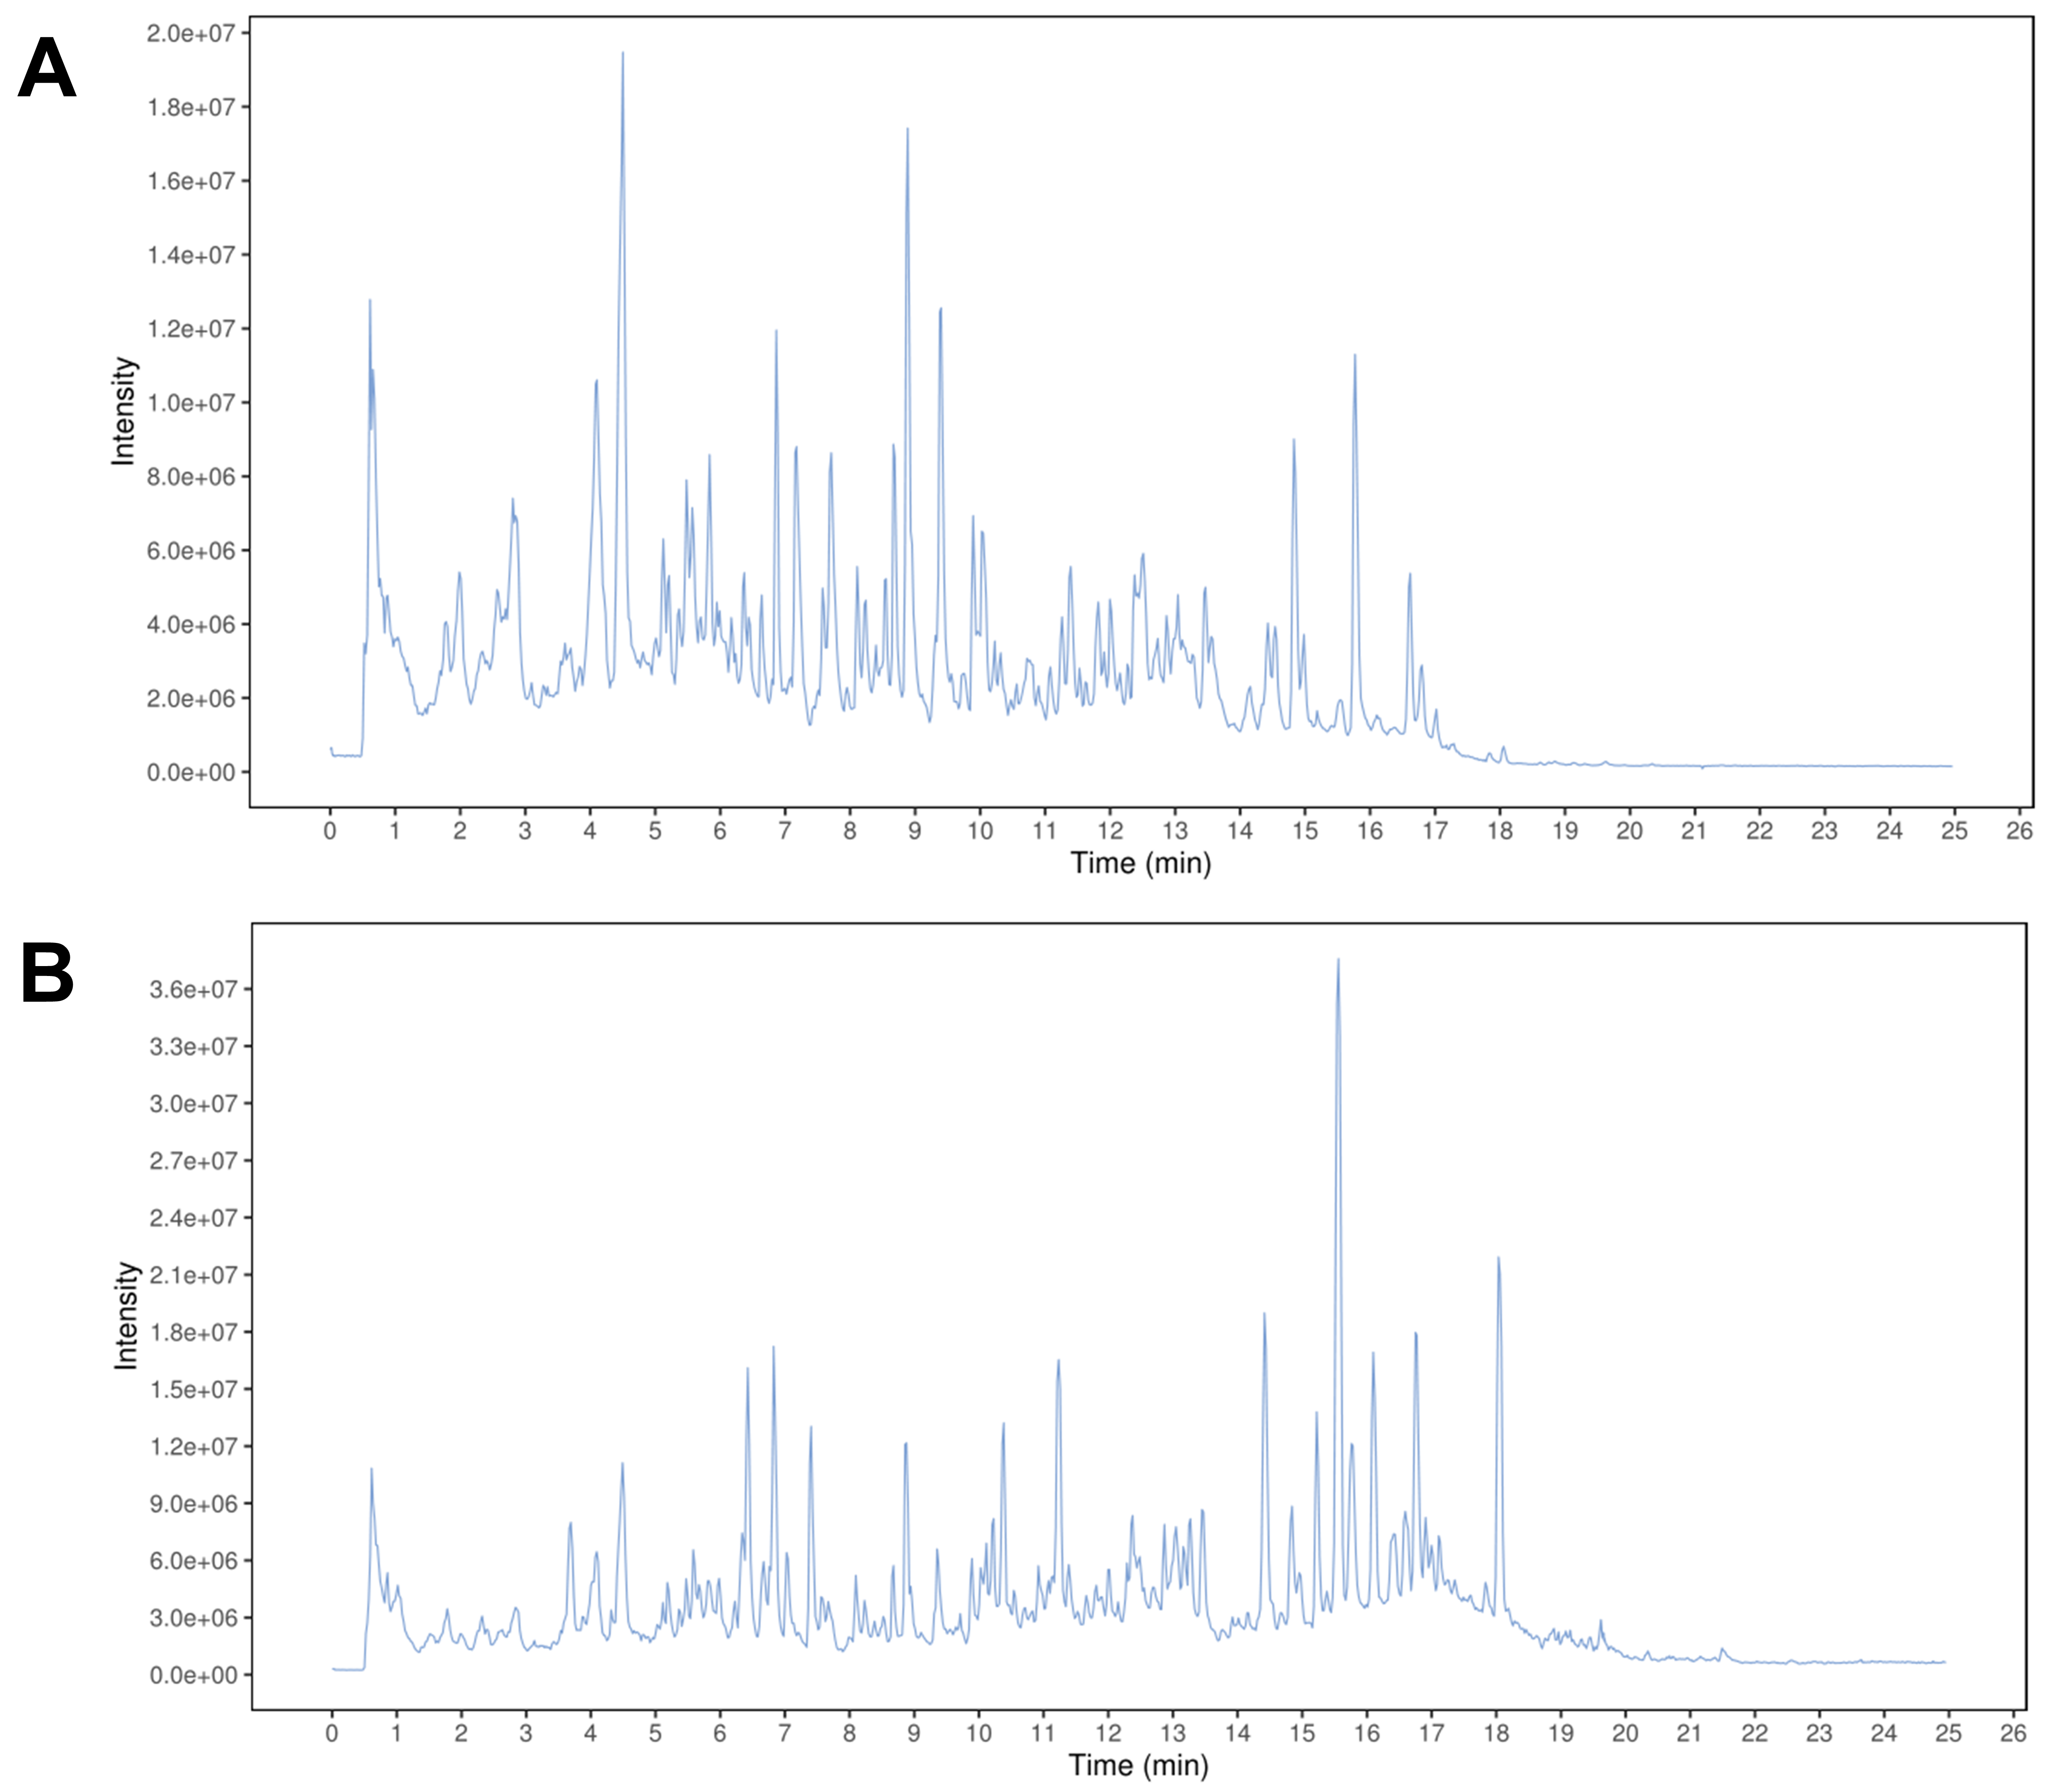
**

**Supplementary Figures S6. The TIC diagram of serum sample1 (high dose drug treatment). (A) Negative ion mode. (B) Positive ion mode**

**
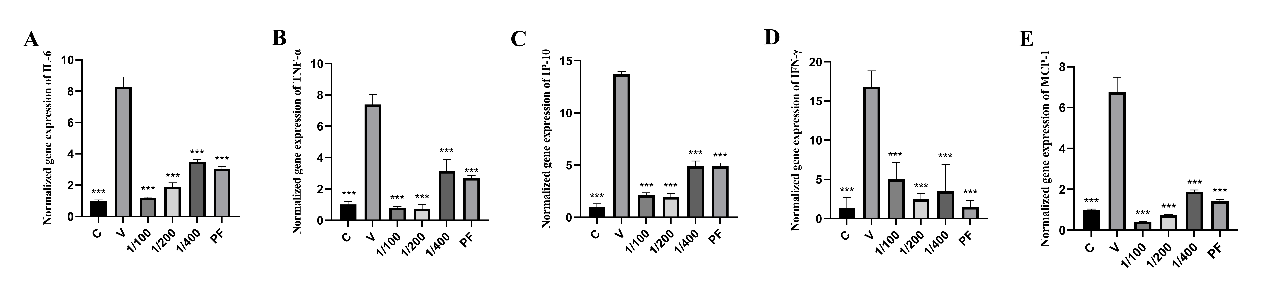
**

**Supplementary Figures S7: RT-qPCR analysis of (A)IL-6, (B)TNF-α, (C)IP-10, (D)MCP-1, and (E)IFN-γ in SARS-CoV-2-infected HMC3 cells treated with XF. The values are presented as the means ± S.D. of six individual experiments. ***p < 0.001, when compared to the viral control.**

**
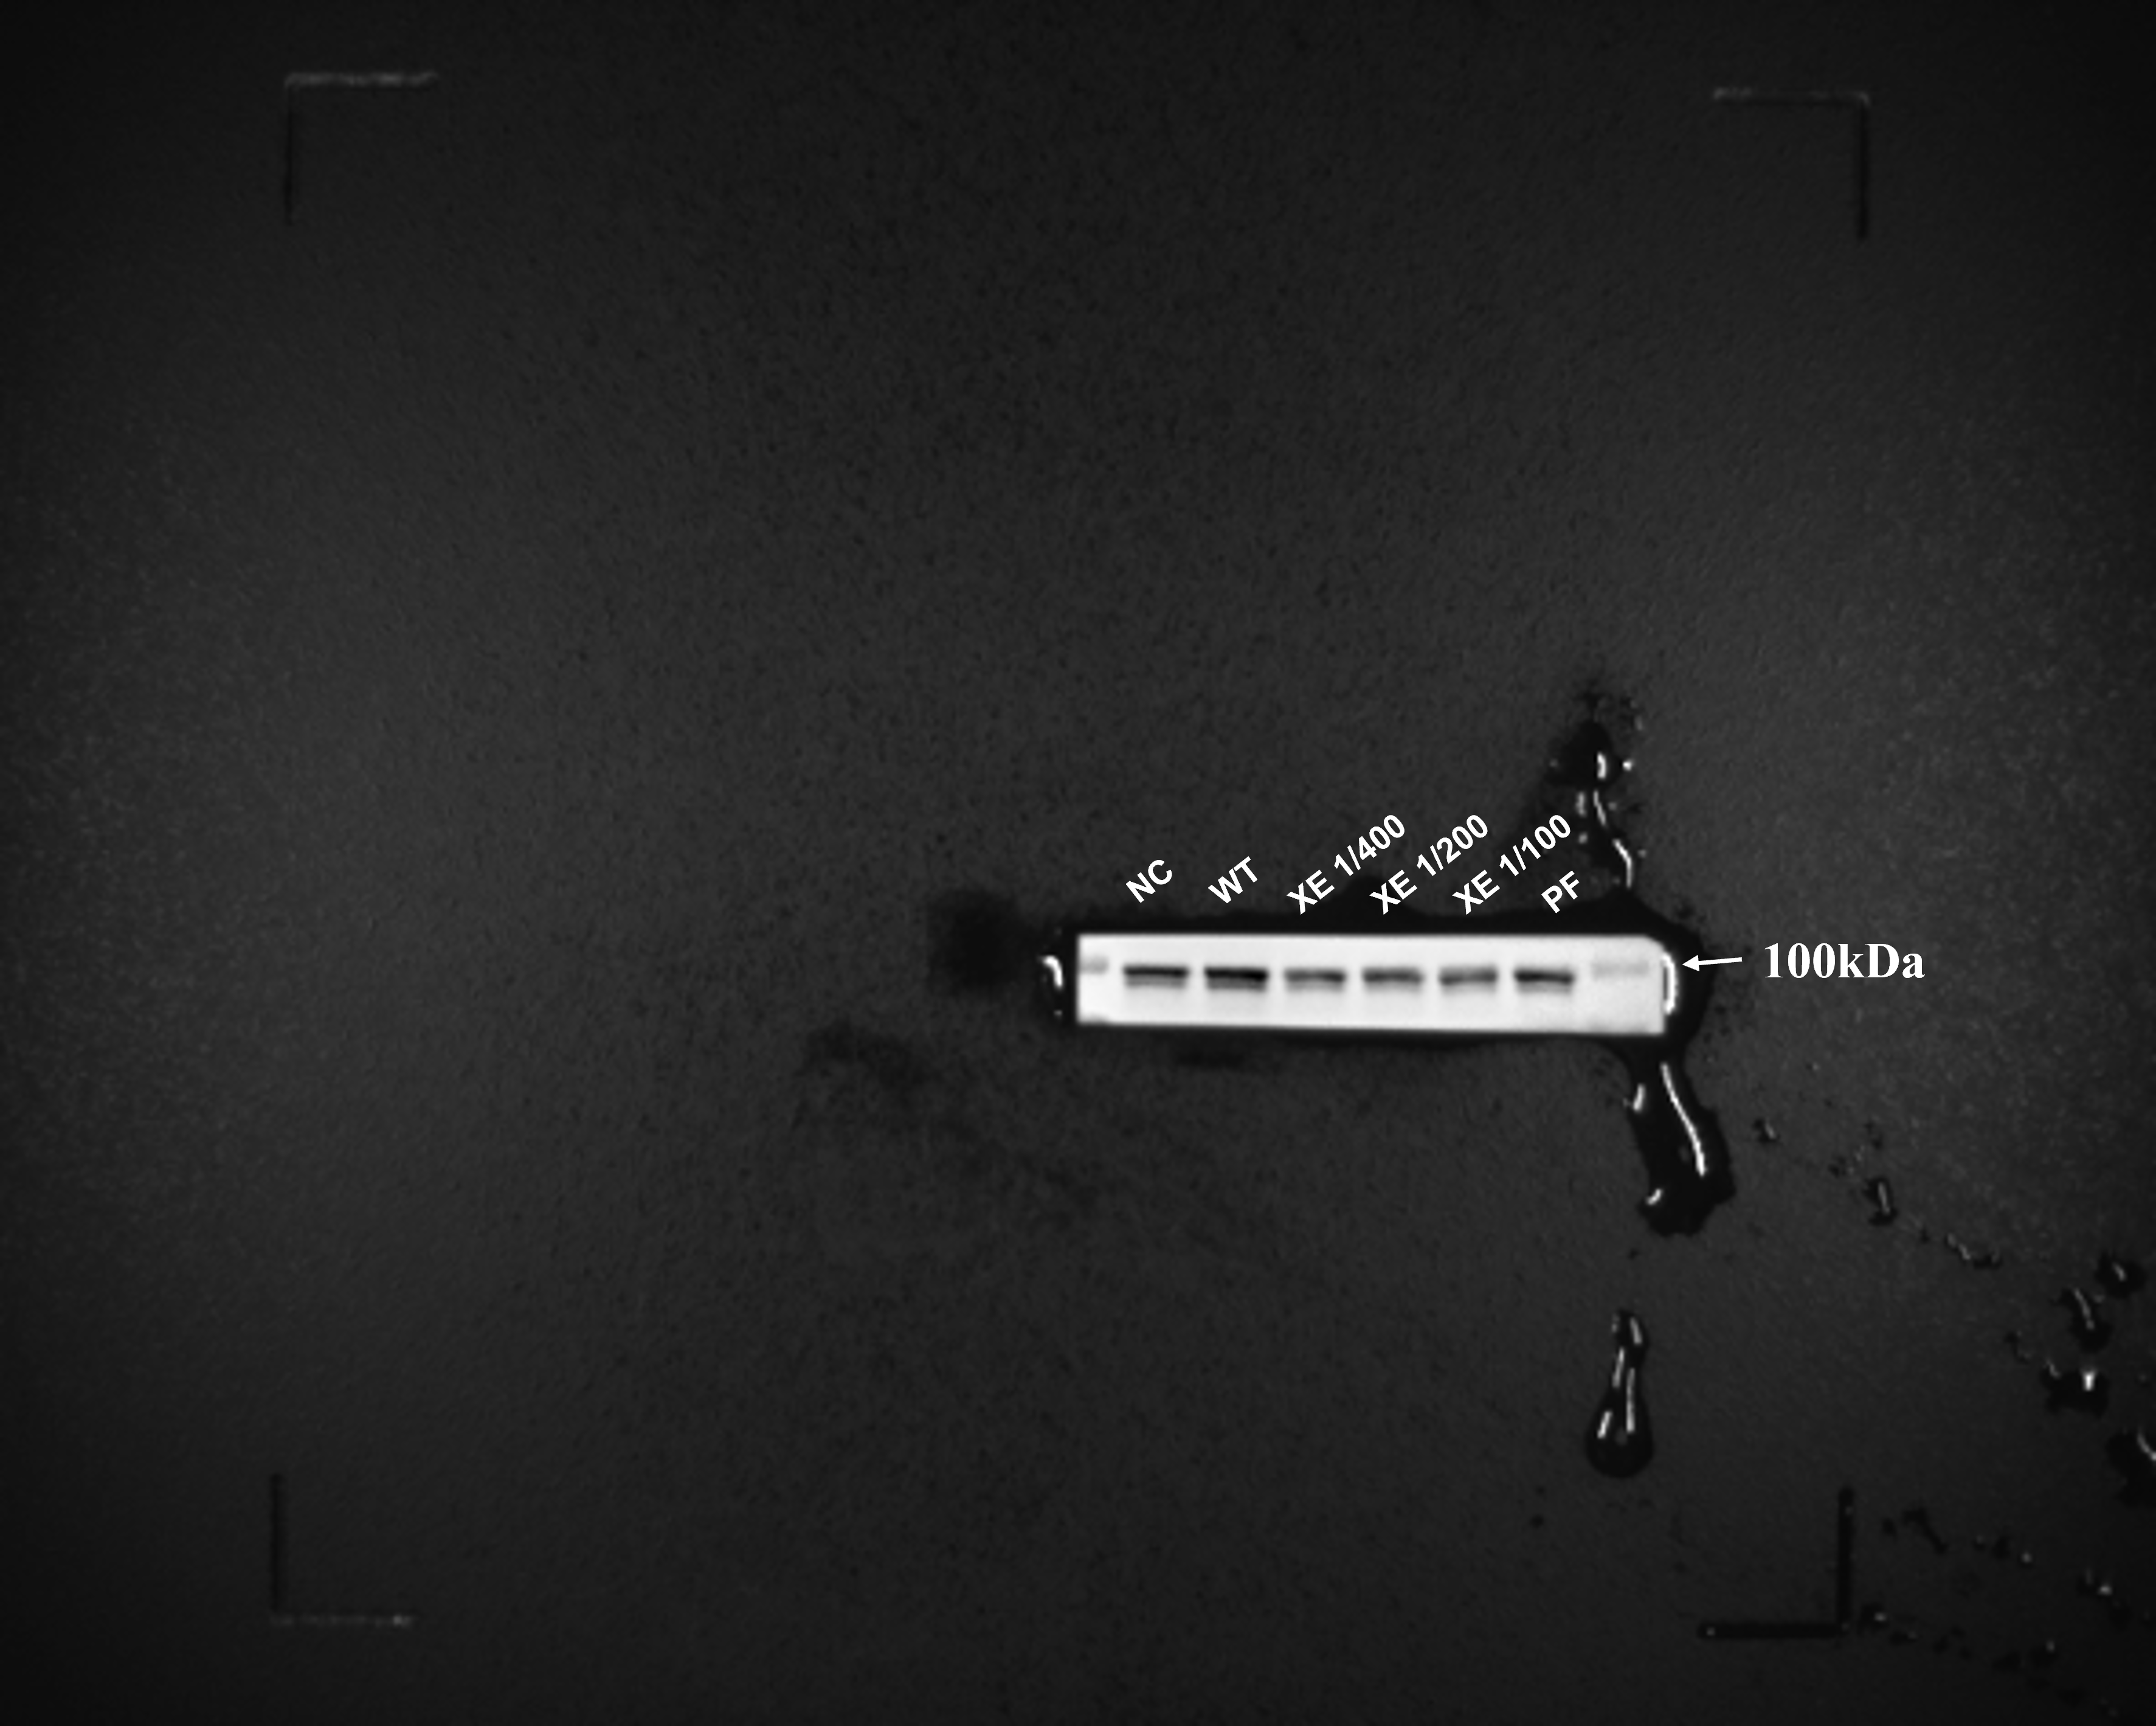
**

**Supplementary Figures S8: The band of STAT1 protein (not cropped)**

**
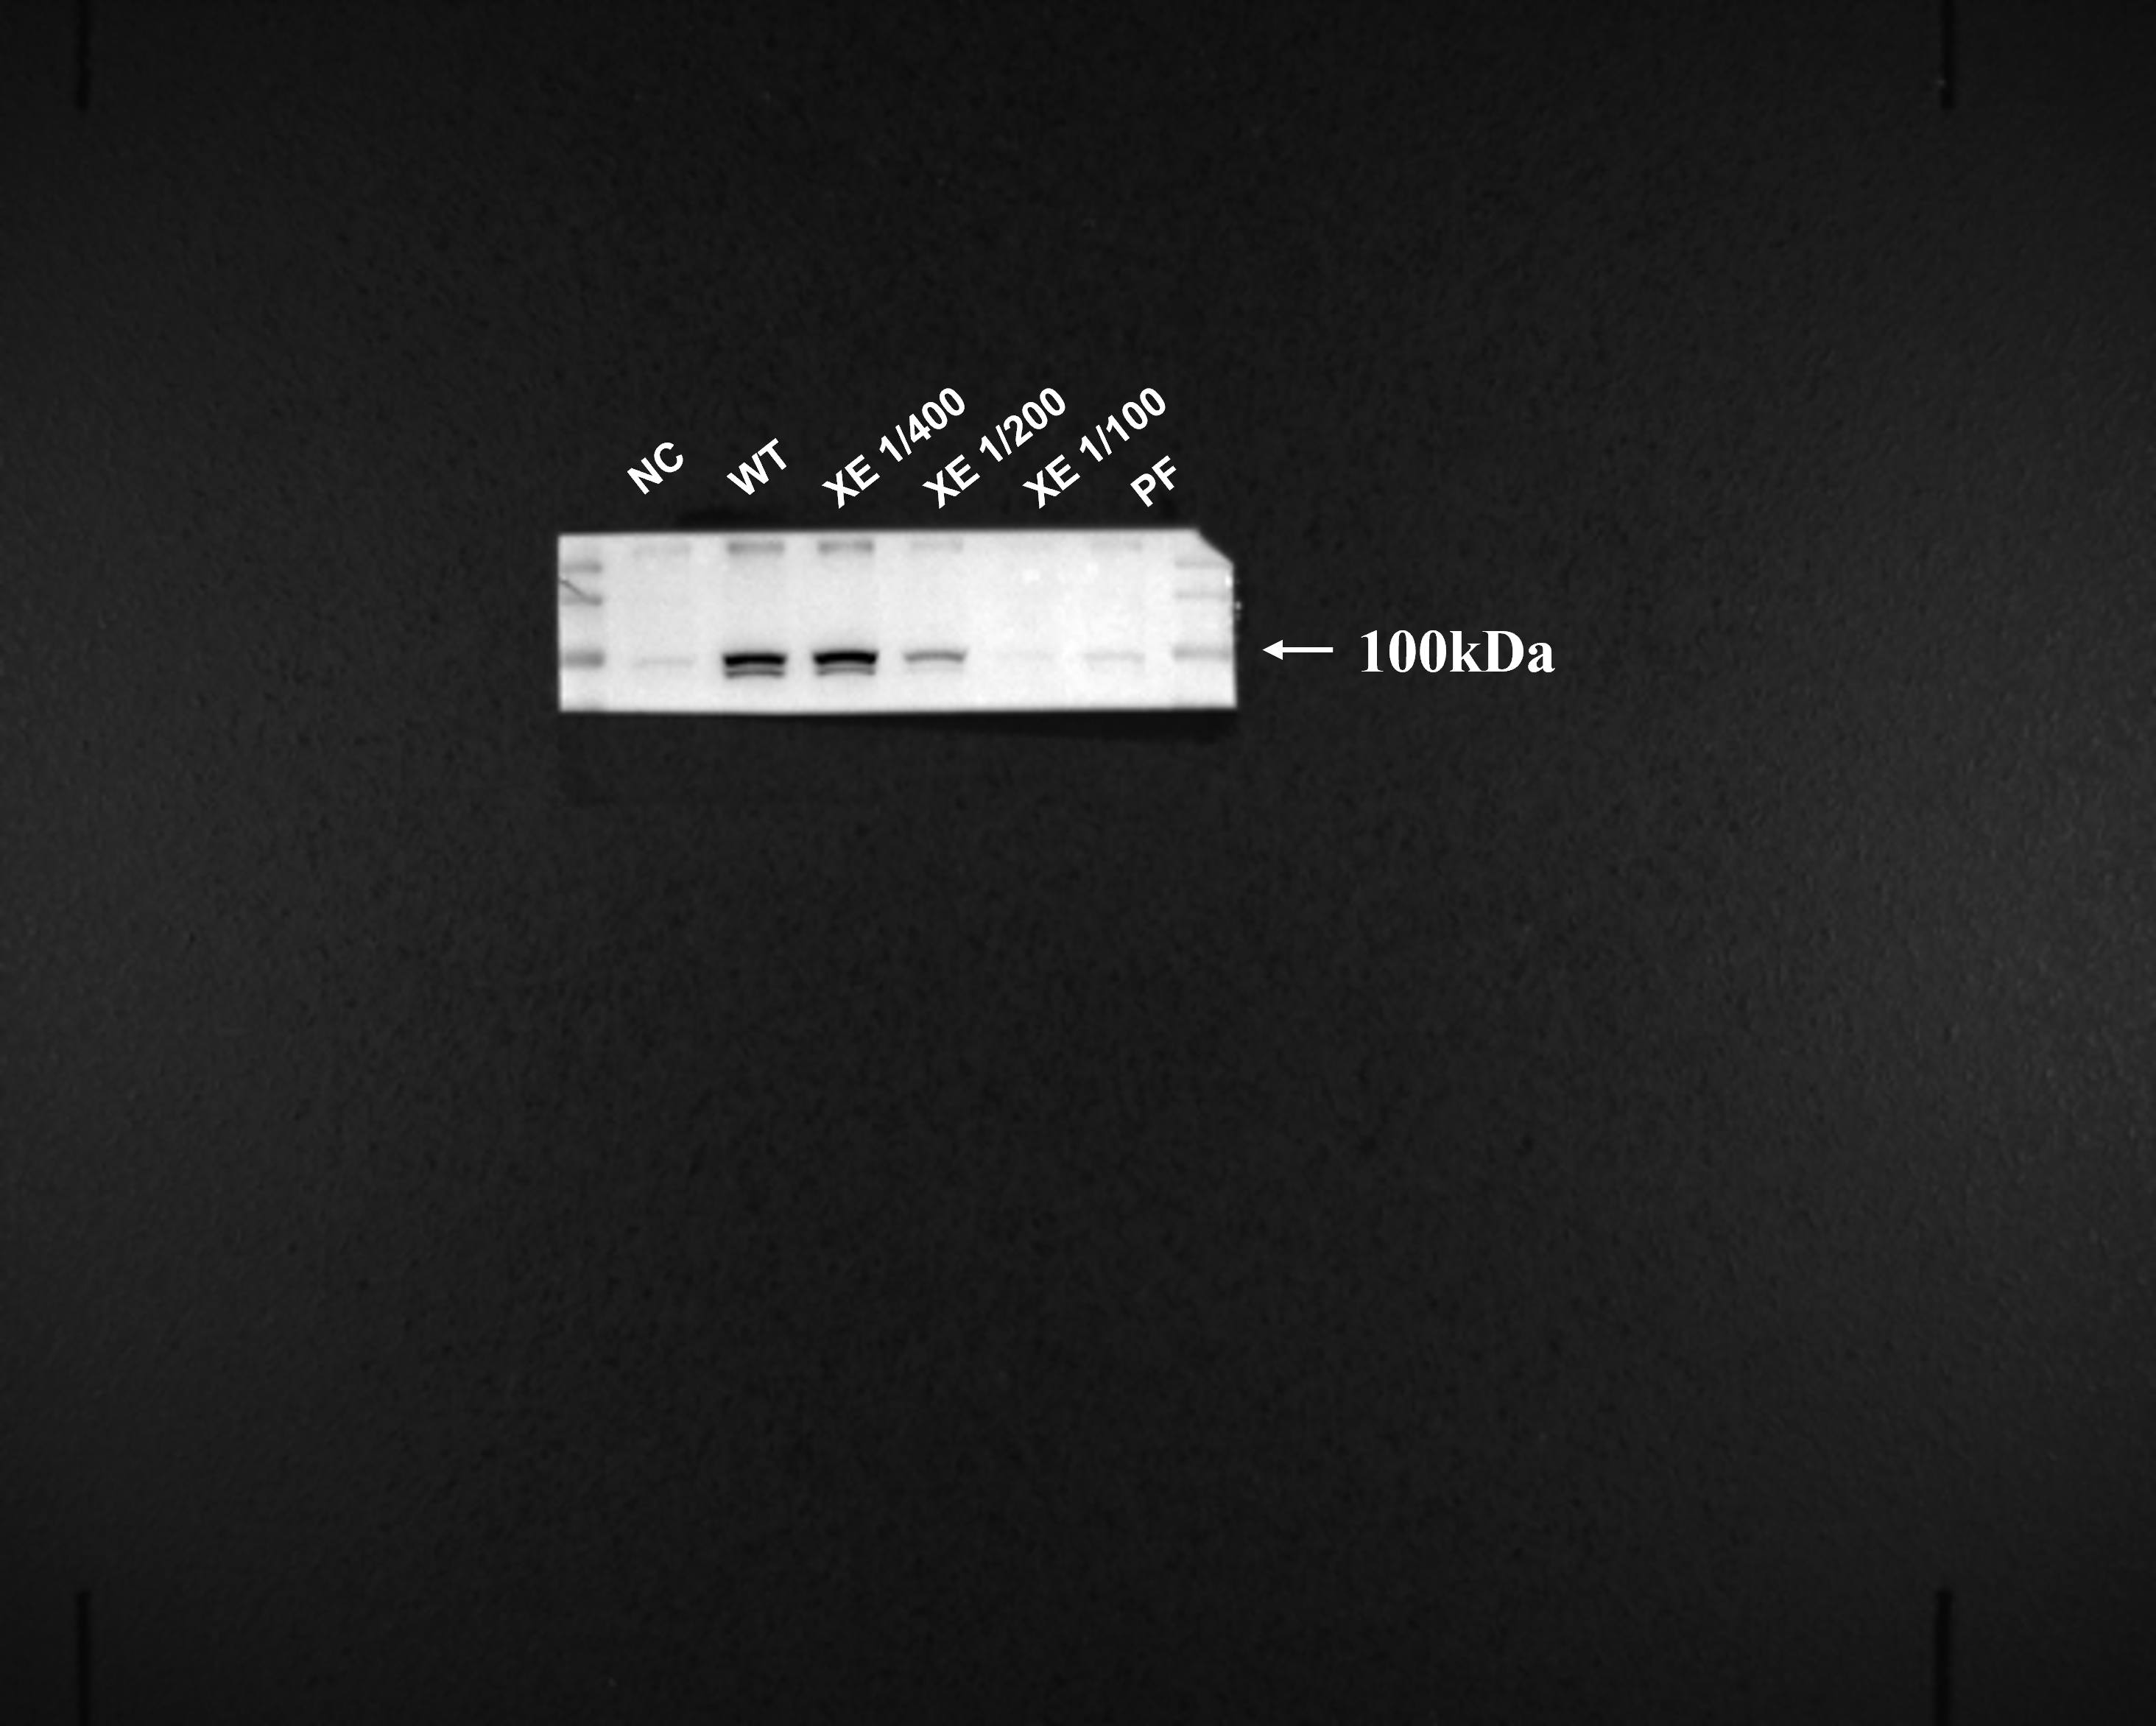
**

**Supplementary Figures S9: The band of P-STAT1 protein (not cropped)**

**
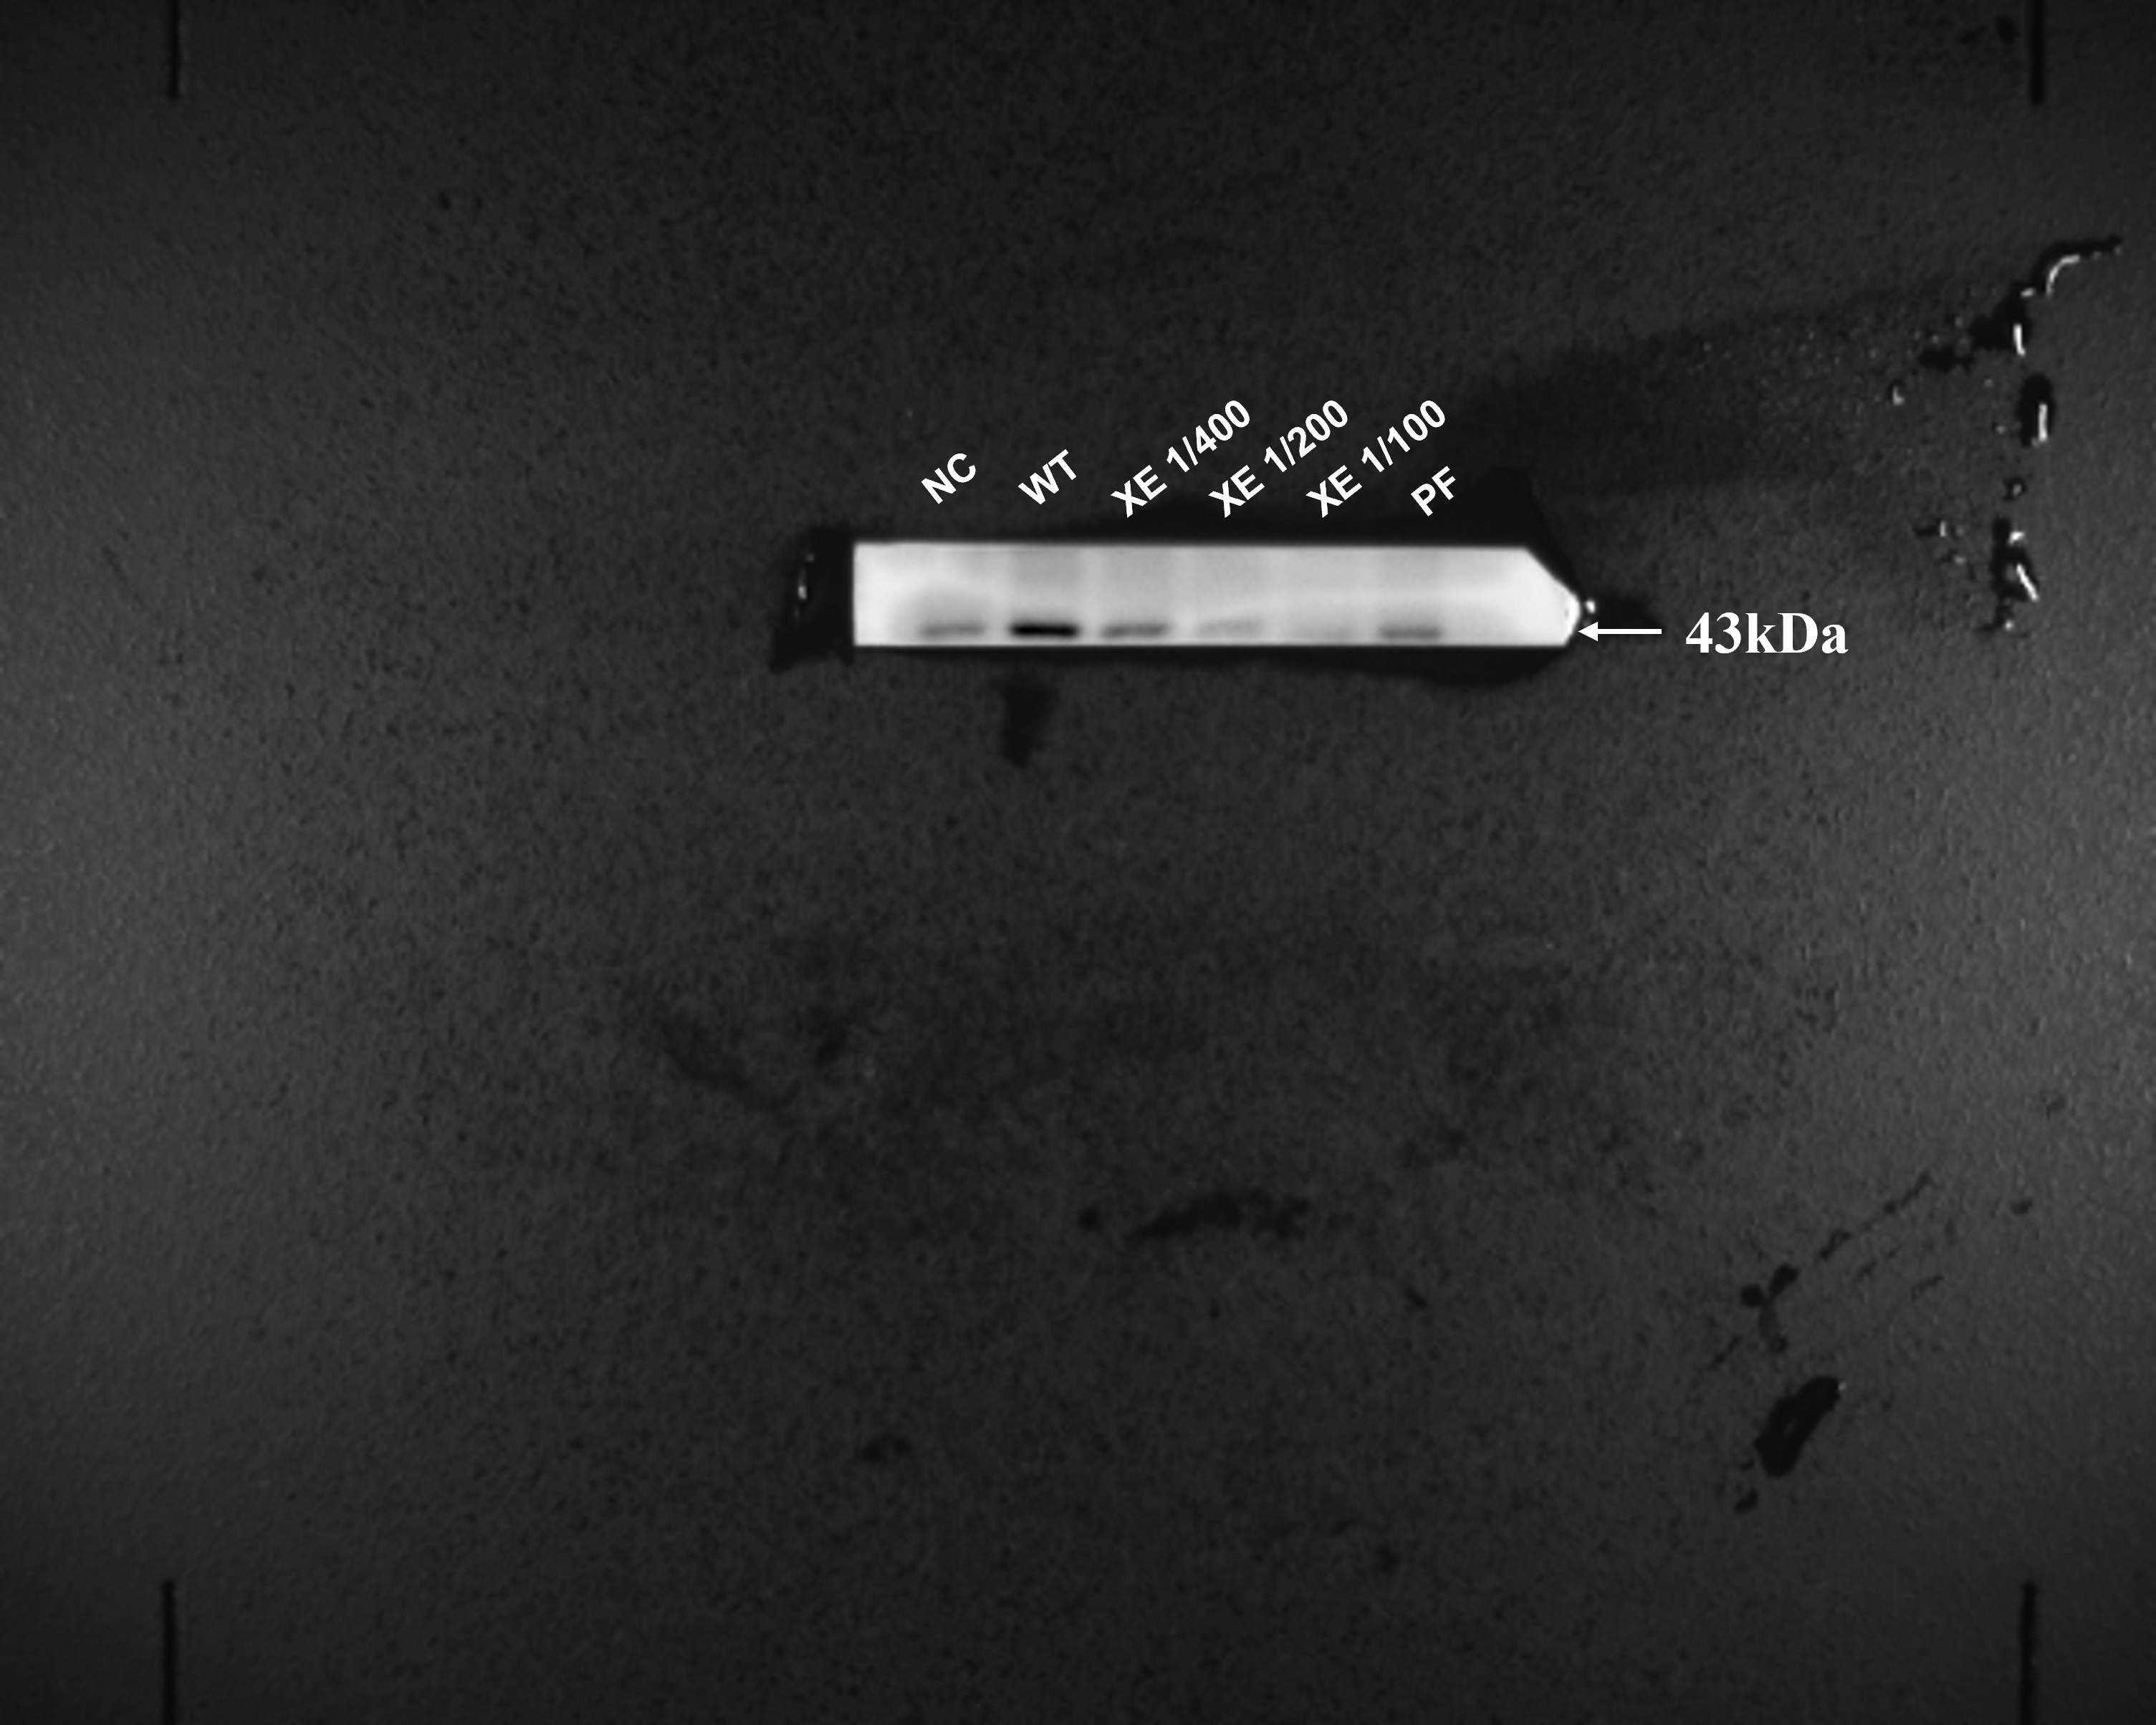
**

**Supplementary Figures S10: The band of P-p38 MAPK protein (not cropped)**

**
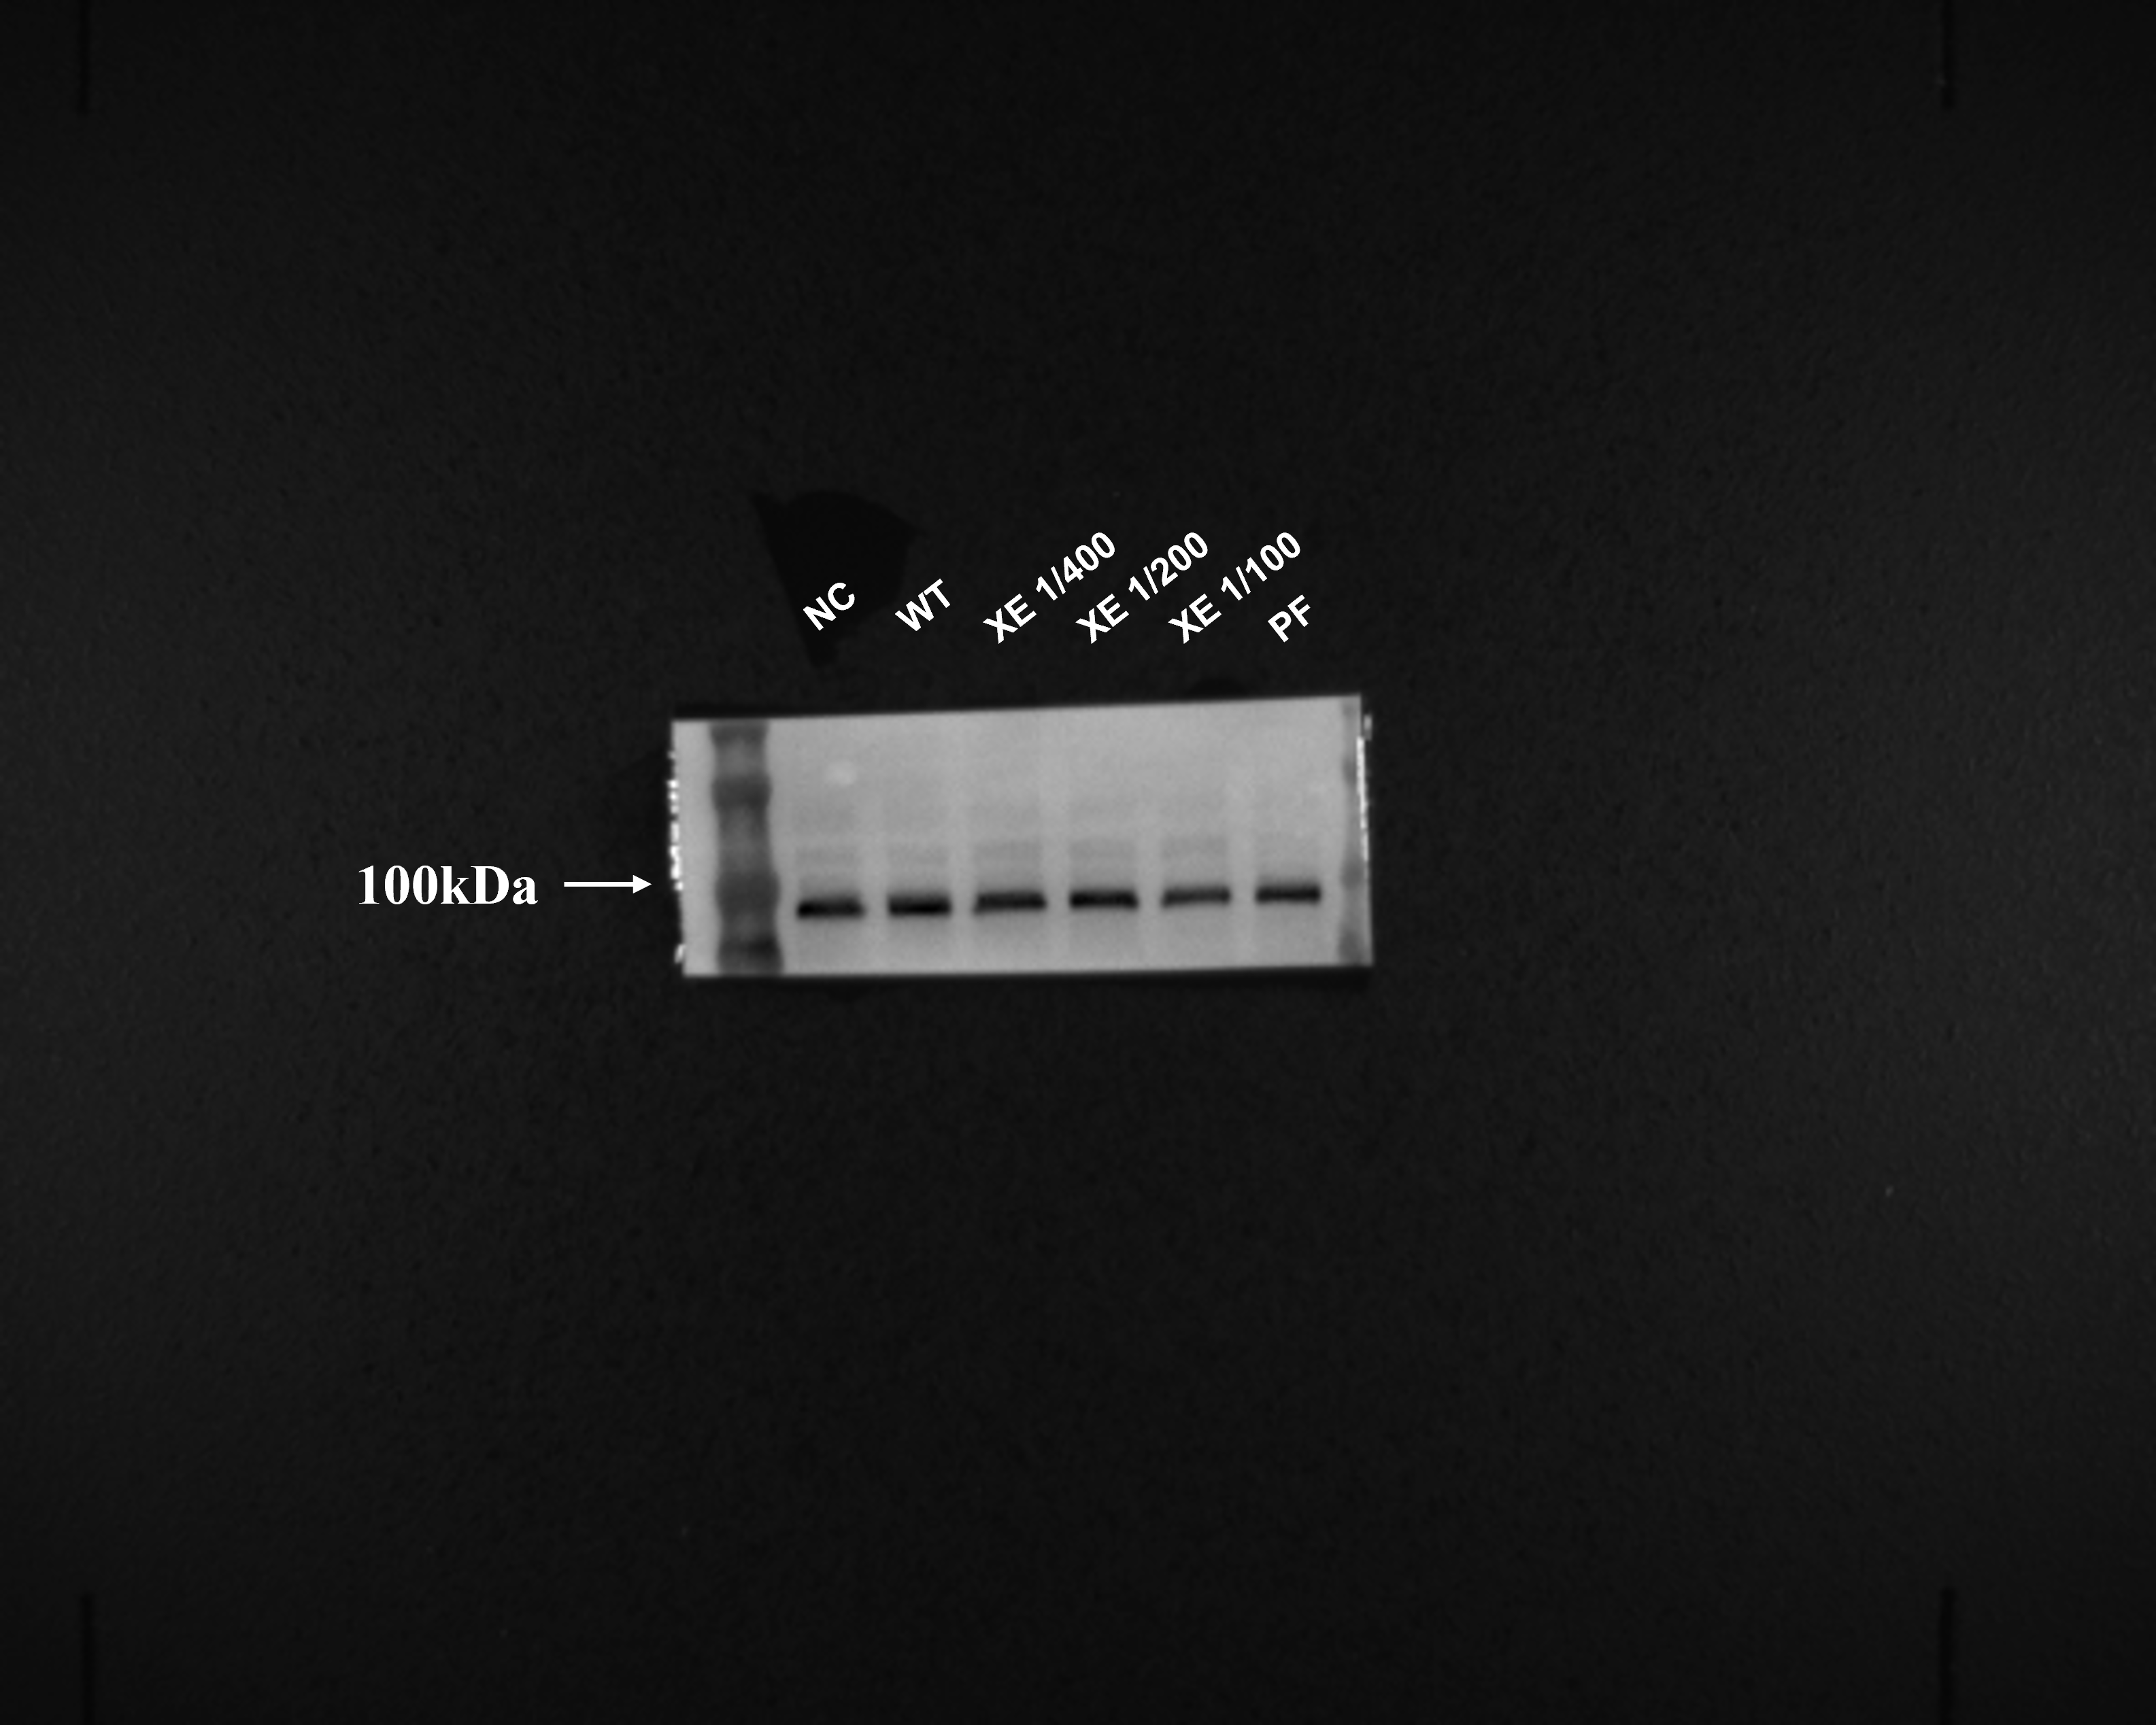
**

**Supplementary Figures S11: The band of PI3K P85α protein (not cropped)**

**
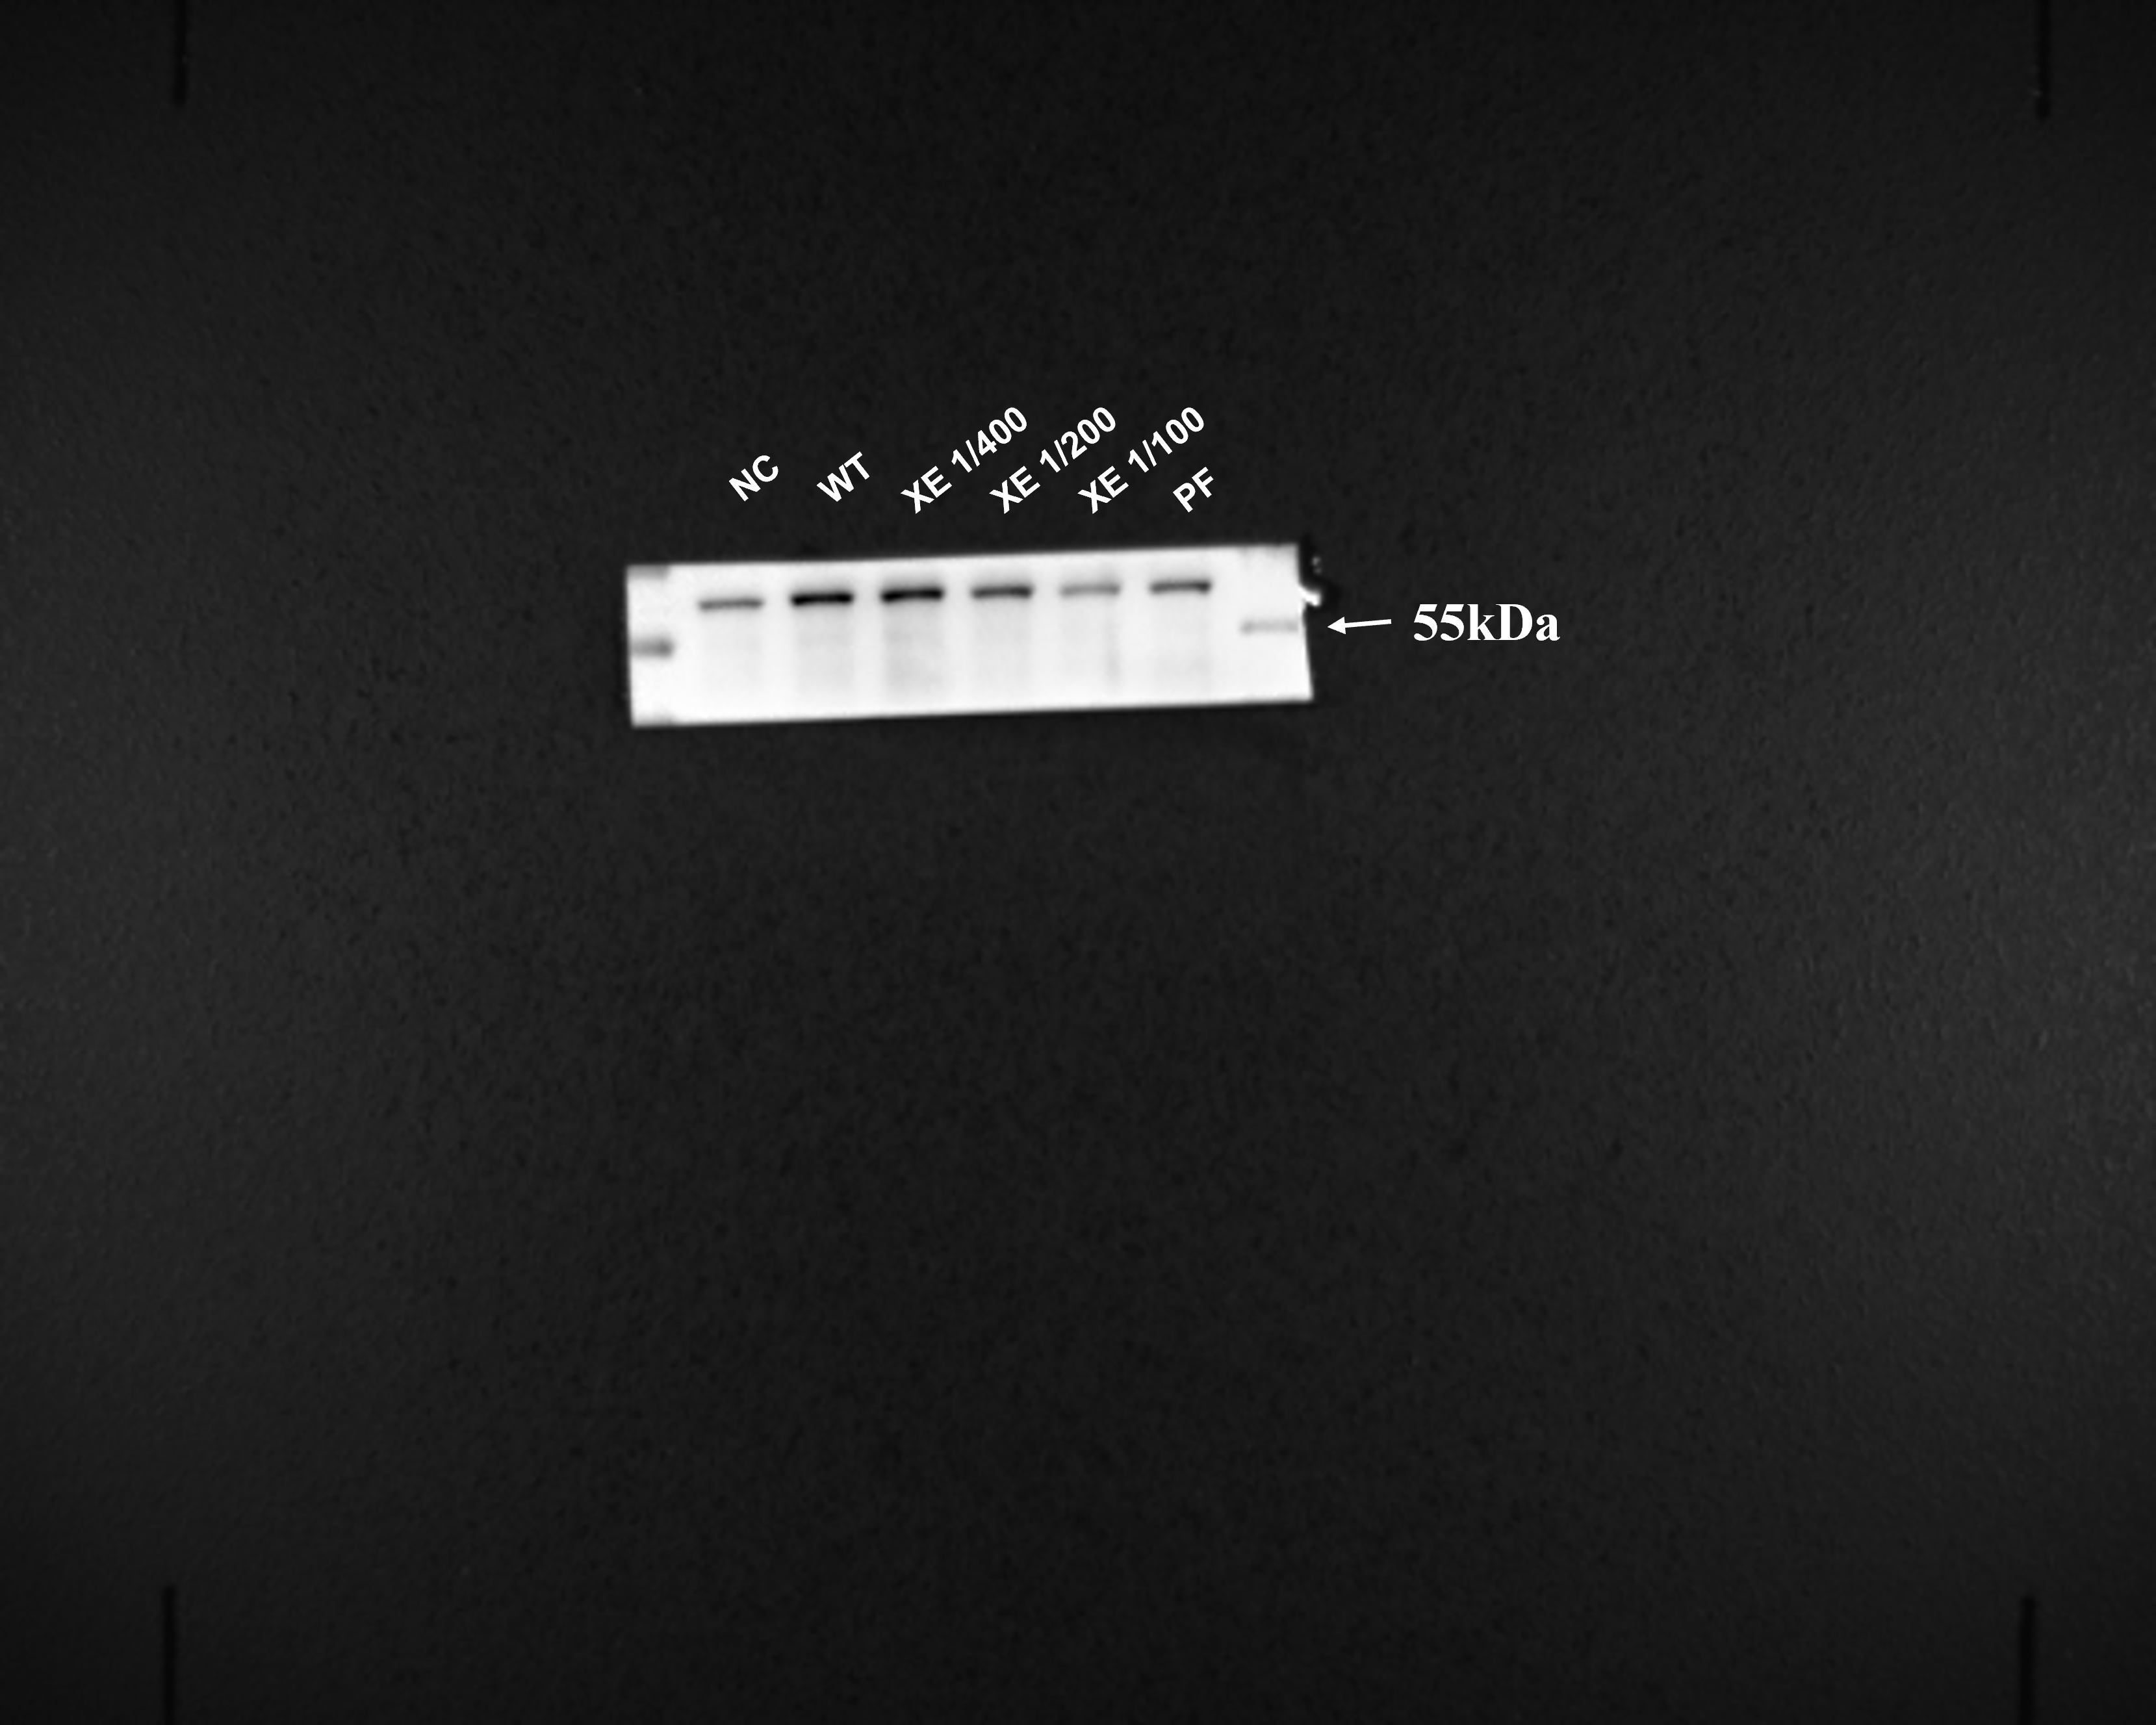
**

**Supplementary Figures S12: The band of P-AKT protein (not cropped)**

**
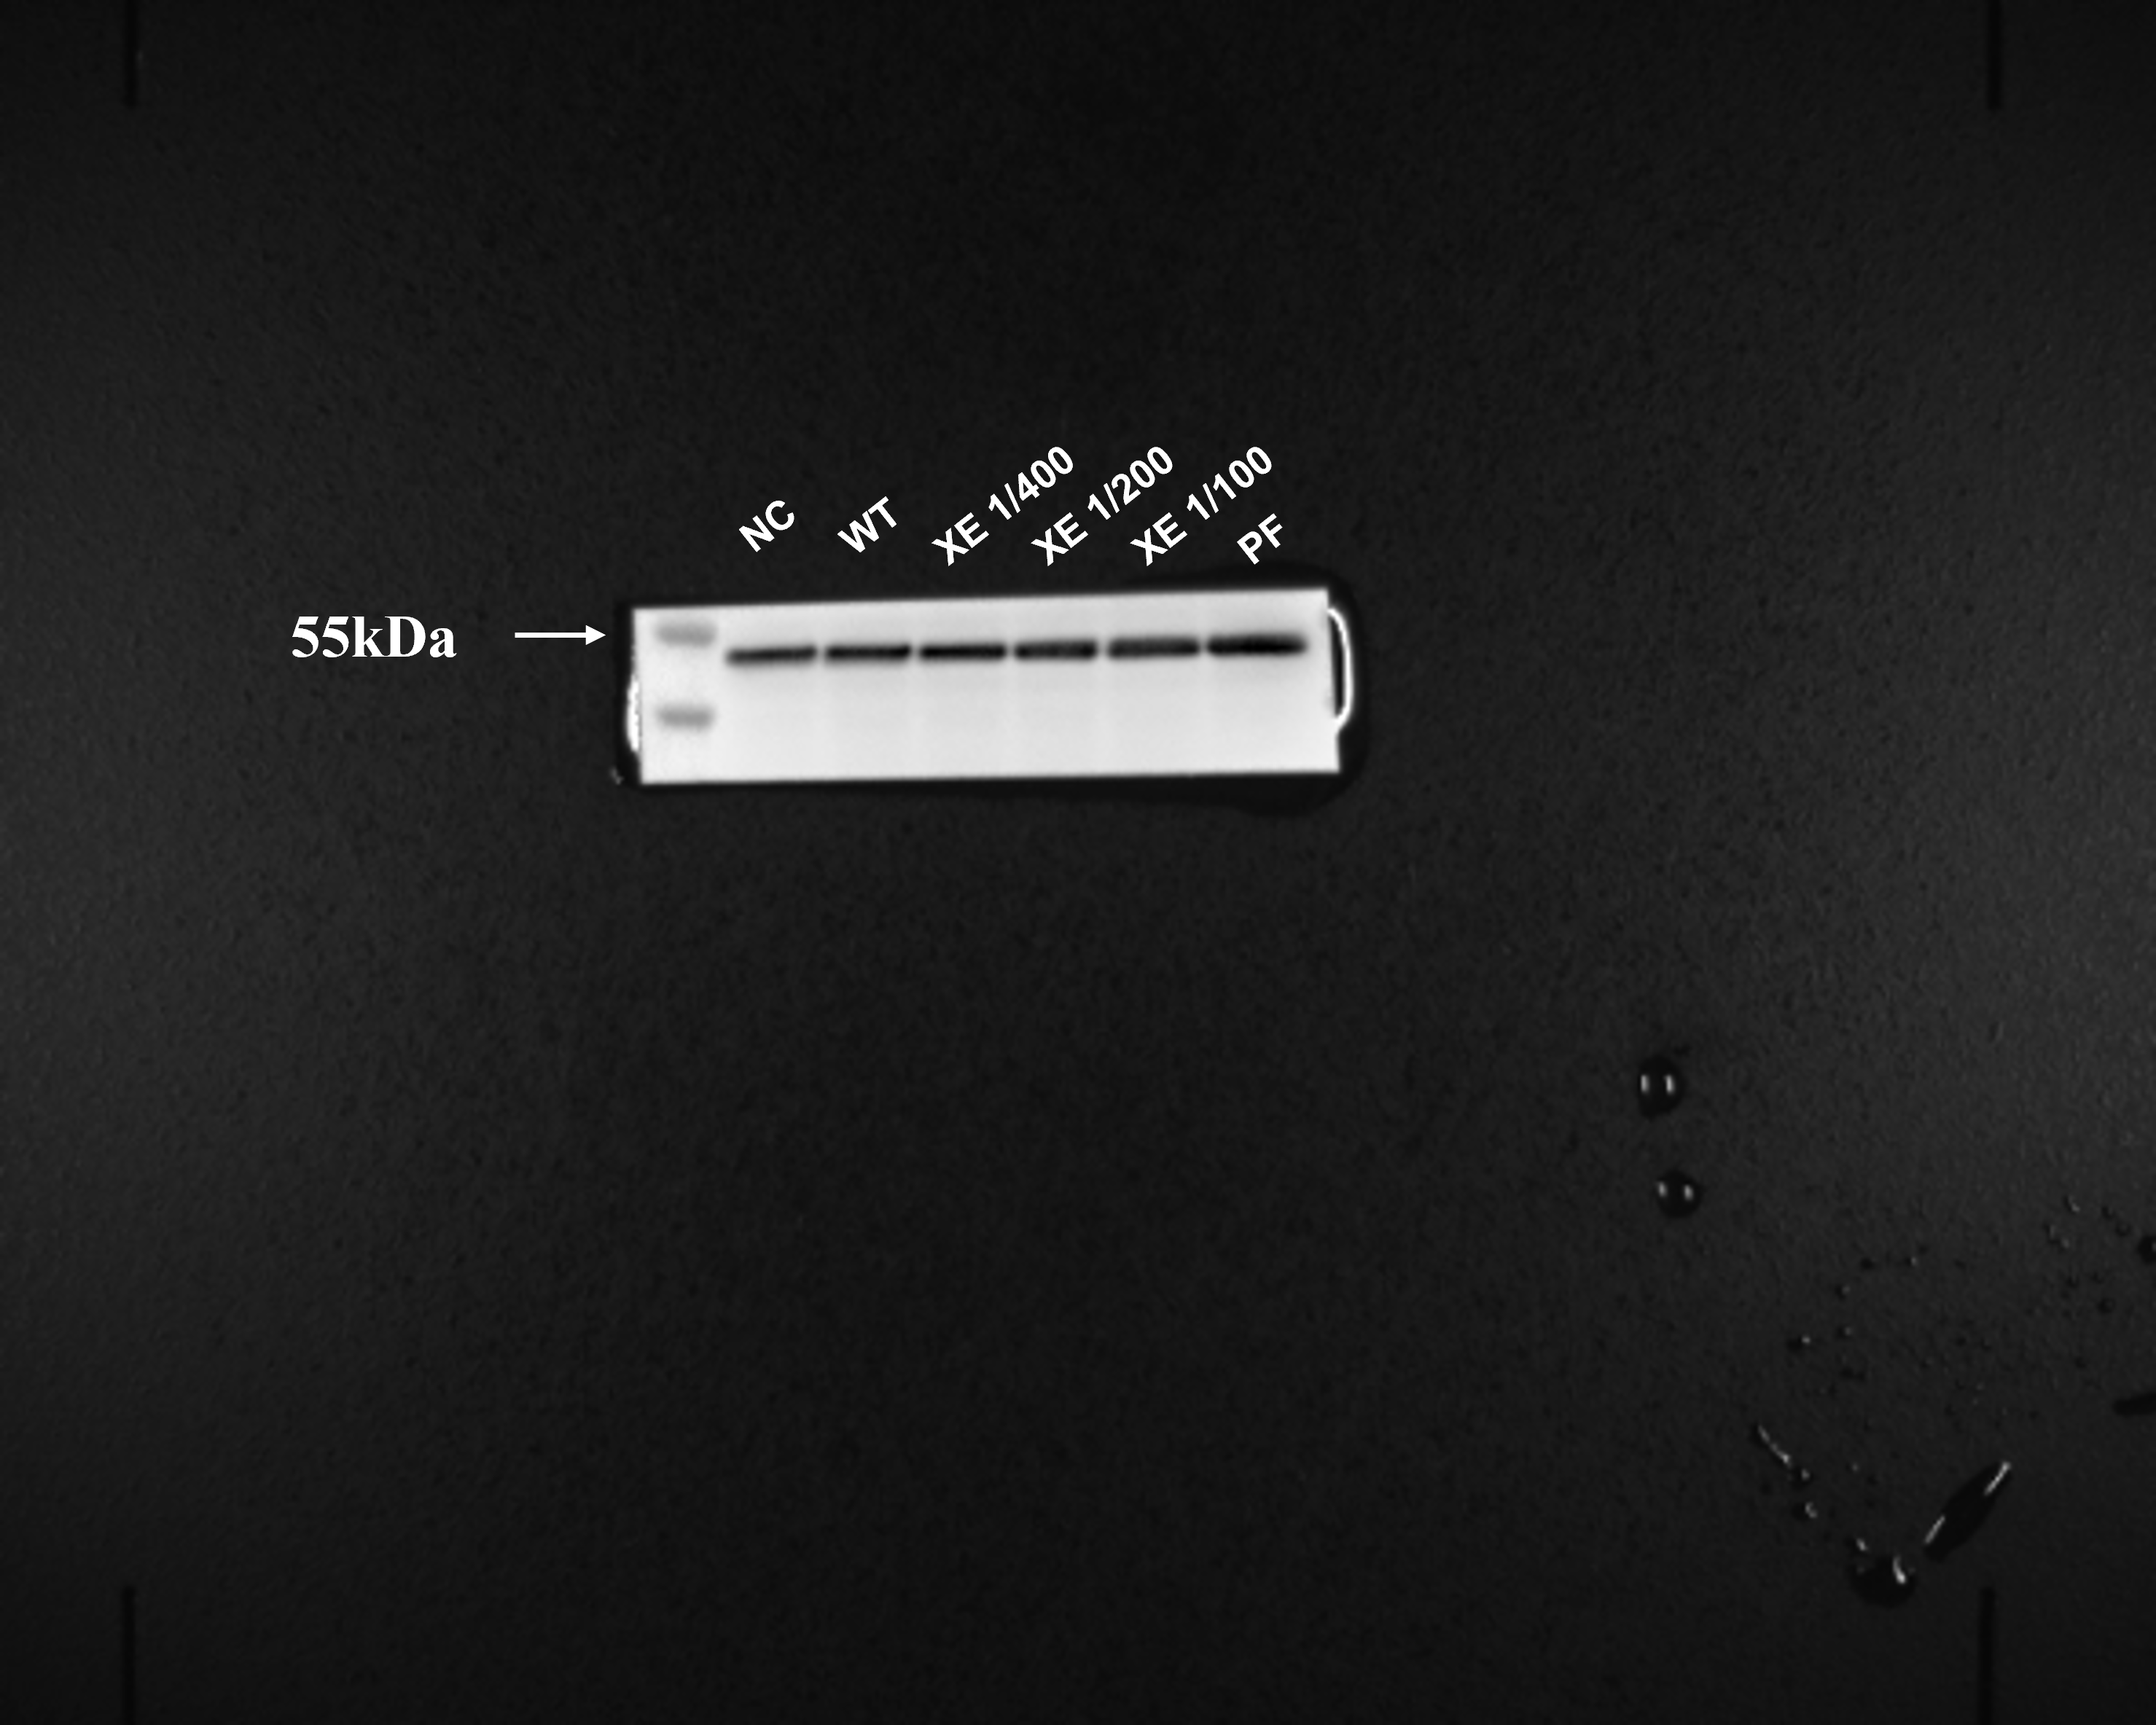
**

**Supplementary Figures S13: The band of p38 MAPK protein (not cropped)**

**
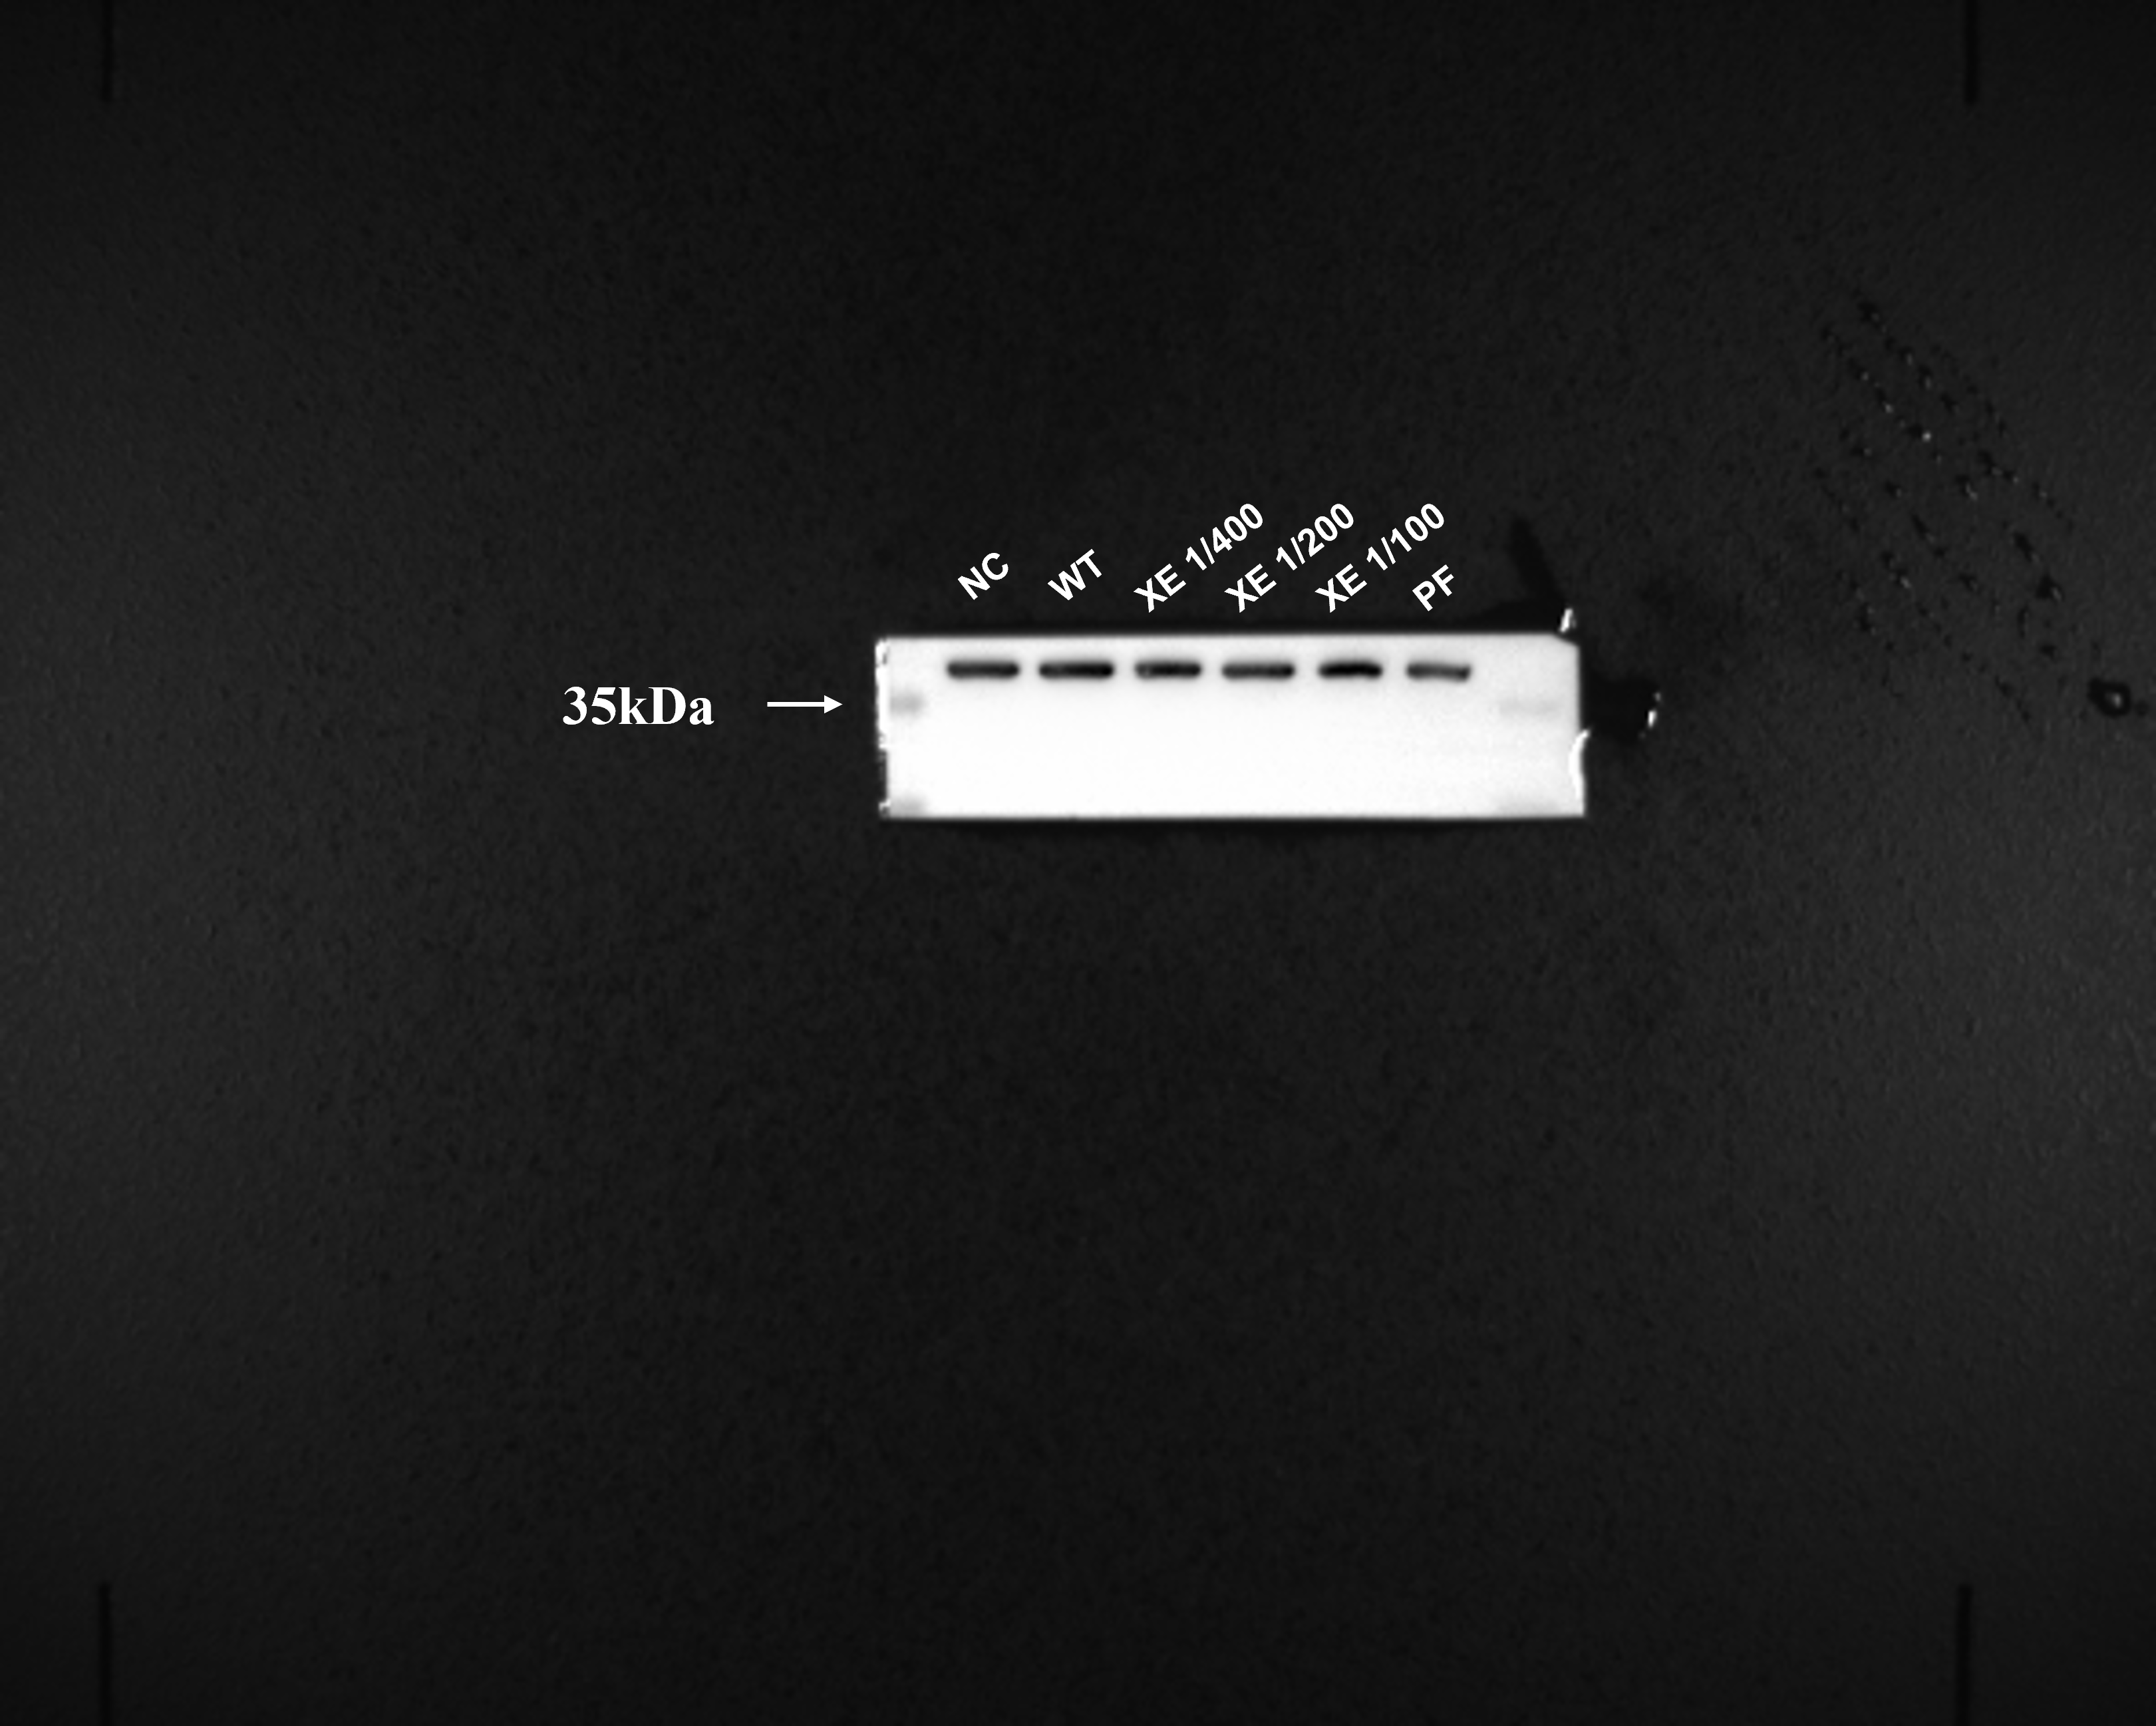
**

**Supplementary Figures S14: The band of GAPDH protein (not cropped)**

**
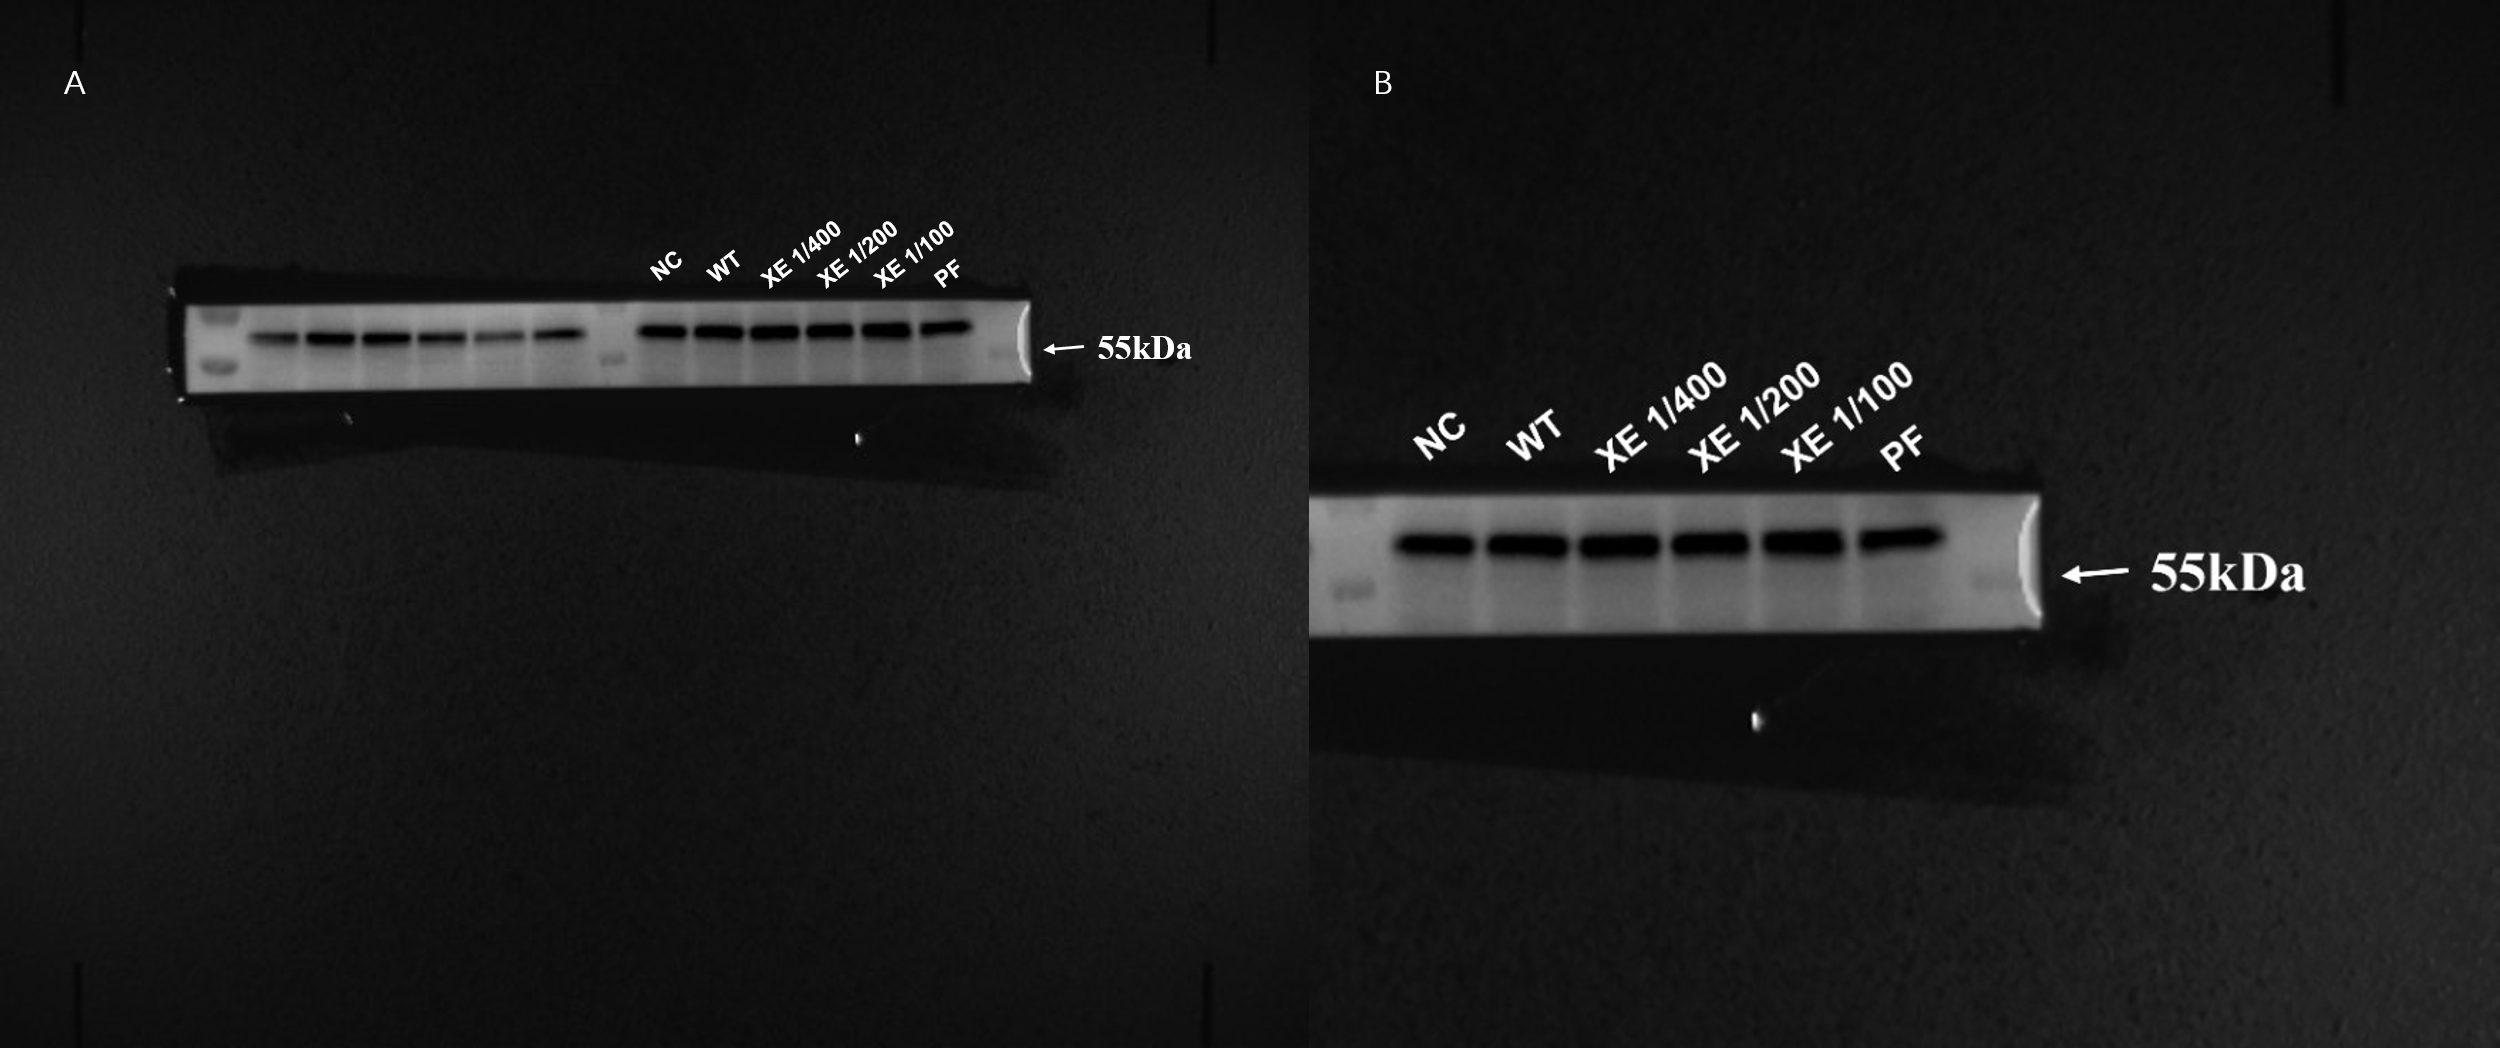
**

**Supplementary Figures S15: The band of AKT protein (not cropped). A. The left part of the membrane contains data from another unrelated experimental group, which is not part of this study. B. This figure displays only the experimental bands relevant to the current study, corresponding to the right portion of Supplementary Figures S15A.**

| **Supplementary Table S1**  **Compounds of Xiaoer Fengreqing obtained by integrating the results of UHPLC-QTOF-MS** | | | | | | |
| --- | --- | --- | --- | --- | --- | --- |
| **Num** | **Compound** | **Category** | **Ionic mode** | **Chemical formula** | **Molecular weight** | **Retention time** |
| 1 | 18.beta.-Glycyrrhetinic acid | Oleanolic acid type pentacyclic triterpenoids | Negative | C30H46O4 | 453.3352003 | 9.357383333 |
| 2 | 3,3',4'-Trimethoxyflavone | Flavonoids | Negative | C18H16O5 | 313.1068372 | 9.334883333 |
| 3 | 3,4-Dihydroxybenzaldehyde | Benzaldehyde | Negative | C7H6O3 | 139.0385657 | 2.611066667 |
| 4 | 3,4-Dimethoxybenzoic acid | Benzoic acids | Negative | C9H10O4 | 165.0540541 | 4.5323 |
| 5 | 3,7-Dihydroxy-3',4'-dimethoxyflavone | Flavonoids | Negative | C17H14O6 | 315.0860071 | 9.8762 |
| 6 | 4'-O-.beta.-D-Glucosyl-5-O-methylvisamminol | Glycosides | Negative | C22H28O10 | 453.174244 | 6.0649 |
| 7 | 5,7-Dihydroxy-8,2'-dimethoxyflavone 7-glucuronide | Flavonoid glycosides | Negative | C23H22O12 | 491.1173405 | 7.915133333 |
| 8 | Acteoside | Phenylpropanoid Glycosides | Negative | C29H36O15 | 647.193449 | 5.457583333 |
| 9 | Albiflorin | Glycosides | Negative | C23H28O11 | 481.1696821 | 4.079166667 |
| 10 | Arctigenin | Lignin | Negative | C21H24O6 | 355.1535261 | 7.126 |
| 11 | Baicalein 6-methyl ether 7-glucuronide | Flavonoid glycosides | Negative | C22H20O11 | 461.1069458 | 7.41865 |
| 12 | Baicalin | Flavonoid glycosides | Negative | C21H18O11 | 447.0923791 | 7.1485 |
| 13 | Baicalin methyl ester | Flavonoid glycosides | Negative | C22H20O11 | 461.1068834 | 7.126 |
| 14 | Caffeic acid | Phenylpropionic acids | Negative | C9H8O4 | 163.0386261 | 3.06205 |
| 15 | Chrysin 6-C-glucoside-8-C-alpha-L-arabinopyranoside | Flavonoid glycosides | Negative | C26H28O13 | 549.1594771 | 5.3676 |
| 16 | Cimifugin | Chromogenic ketones | Negative | C16H18O6 | 307.1173439 | 5.66025 |
| 17 | Cynarin | Caffeioyl Quinic Acids | Negative | C25H24O12 | 499.1226769 | 5.817066667 |
| 18 | Dihydronorwogonin | Flavonoids | Negative | C15H12O5 | 273.0754294 | 7.035683333 |
| 19 | Diosmetin | Flavonoids | Negative | C16H12O6 | 301.0704622 | 8.005116667 |
| 20 | Genipin | Iridoids | Negative | C11H14O5 | 209.0806809 | 3.78585 |
| 21 | Geniposide | Iridoid glycosides | Negative | C17H24O10 | 411.1260419 | 3.78585 |
| 22 | Glycyrrhizic acid | Triterpene saponin | Negative | C42H62O16 | 823.4094348 | 9.357383333 |
| 23 | Hesperidin | Flavonoid glycosides | Negative | C28H34O15 | 611.1960132 | 6.380883333 |
| 24 | Hispidulin 7-O-beta-glucuronide | Flavonoid glycosides | Negative | C22H20O12 | 477.1018432 | 7.59965 |
| 25 | Hyperoside | Flavonol glycosides | Negative | C21H20O12 | 465.1016442 | 3.265366667 |
| 26 | Isoorientin | Flavonoids | Negative | C21H20O11 | 449.1071152 | 4.352483333 |
| 27 | Isosakuranetin | Flavonoids | Negative | C16H14O5 | 287.0907085 | 7.554483333 |
| 28 | Linarin | Flavonoid glycosides | Negative | C28H32O14 | 593.1853002 | 7.193333333 |
| 29 | Naringenin-4'-O-.beta.-D-glucuronide | Flavonoid glycosides | Negative | C21H20O11 | 449.1065333 | 7.035683333 |
| 30 | Nobiletin | Flavonoids | Negative | C21H22O8 | 403.1378717 | 9.853866667 |
| 31 | Oleoside 11-methyl ester | Phenylpropanoids | Negative | C17H24O11 | 427.1204447 | 4.5323 |
| 32 | Oroxylin A | Flavonoids | Negative | C16H12O5 | 285.0755268 | 10.01085 |
| 33 | p-Coumaric acid | coumarin | Negative | C9H8O3 | 147.0435355 | 4.26115 |
| 34 | Pectolinarigenin | Flavonoids | Negative | C17H14O6 | 315.086028 | 9.492383333 |
| 35 | Poncirin | Flavonoid glycosides | Negative | C28H34O14 | 595.2004608 | 7.350666667 |
| 36 | prim-O-Glucosylcimifugin | Flavonoid glycosides | Negative | C22H28O11 | 469.1699234 | 4.7818 |
| 37 | Rutin | Flavonoids | Negative | C27H30O16 | 611.1597733 | 5.119766667 |
| 38 | Saikosaponin D | Triterpene saponin | Negative | C42H68O13 | 803.453259 | 9.943516667 |
| 39 | Scutellarein tetramethyl ether | Flavonoids | Negative | C19H18O6 | 343.1171959 | 9.920866667 |
| 40 | Scutellarin | Flavonoid glycosides | Negative | C21H18O12 | 463.0864293 | 5.322766667 |
| 41 | sec-O-Glucosylhamaudol | Flavonoid glycosides | Negative | C21H26O10 | 439.159272 | 7.41865 |
| 42 | Stachydrine | Pyrrolidine alkaloids | Negative | C7H13NO2 | 144.101556 | 0.655833333 |
| 43 | Suspensaside | Caffeic acyl phenylethanol glycoside | Negative | C29H36O16 | 663.1887847 | 4.283983333 |
| 44 | Sweroside | Iridoid glycosides | Negative | C16H22O9 | 359.1335781 | 3.9435 |
| 45 | Tachiogroside B |  | Negative | C18H24O12 | 433.1334213 | 3.4892 |
| 46 | Tectorigenin | Flavonoids | Negative | C16H12O6 | 301.0704275 | 8.568766667 |
| 47 | Trigonelline | Pinidine alkaloids | Negative | C7H7NO2 | 138.0545597 | 0.655833333 |
| 48 | DL-Arginine | Amino acid | Negative | C6H14N4O2 | 175.1187053 | 0.56685 |
| 49 | Stachyose | Sugar | Negative | C24H42O21 | 689.2102969 | 0.589183333 |
| 50 | Glycerophosphocholine | Alkaloids | Negative | C8H20NO6P | 280.0925894 | 0.633516667 |
| 51 | Sucrose | Sugar | Negative | C12H22O11 | 365.1051896 | 0.633516667 |
| 52 | 3-Aminopentanoic acid | Amino acid | Negative | C5H11NO2 | 118.0859198 | 0.678516667 |
| 53 | Adenine | Amino acid | Negative | C5H5N5 | 136.0616234 | 0.701333333 |
| 54 | Synephrine | Alkaloids | Negative | C9H13NO2 | 150.0909641 | 0.768333333 |
| 55 | Nicotinic acid | Vitamins | Negative | C6H5NO2 | 124.03909 | 0.835166667 |
| 56 | Adenosine | Azosides | Negative | C10H13N5O4 | 268.1042109 | 0.857833333 |
| 57 | Phenylacetaldehyde | Aromatic aldehydes | Negative | C8H8O | 121.0643385 | 0.9255 |
| 58 | L-Isoleucine | Amino acid | Negative | C6H13NO2 | 132.101479 | 1.015983333 |
| 59 | L-Tyrosine | Amino acid | Negative | C9H11NO3 | 182.080433 | 1.357466667 |
| 60 | L-Phenylalanine | Amino acid | Negative | C9H11NO2 | 166.085857 | 1.471966667 |
| 61 | 2-Amino-1-phenylethanol | Alkaloids | Negative | C8H11NO | 120.0802723 | 1.4948 |
| 62 | trans-Cinnamic acid | Phenylpropionic acids | Negative | C9H8O2 | 149.0592263 | 1.4948 |
| 63 | (3,4-Dihydroxyphenyl)ethanol | Phenylpropionic acids | Negative | C8H10O3 | 137.0593186 | 1.5638 |
| 64 | 5-Hydroxymethyl-2-furaldehyde | Furan cyclic aldehyde | Negative | C6H6O3 | 109.0280384 | 1.635883333 |
| 65 | Rotundioside N | Triterpene saponin | Negative | C48H78O18 | 965.5067377 | 10.12401667 |
| 66 | 9-Hydroperoxy-10E,12Z,15Z-octadecatrienoic acid | Fatty Acids | Negative | C18H30O4 | 311.2211134 | 10.39433333 |
| 67 | Tangeritin | Flavonoids | Negative | C20H20O7 | 373.1276109 | 10.461 |
| 68 | Stearidonic acid | Fatty Acids | Negative | C18H28O2 | 277.2157333 | 10.551 |
| 69 | Artemisetin | Flavonoids | Negative | C20H20O8 | 389.1223044 | 10.82198333 |
| 70 | 3-Hydroxy-3',4'-dimethoxyflavone | Flavonoids | Negative | C17H14O5 | 299.0908399 | 11.13846667 |
| 71 | 9,10-Dihydroxy-12Z-octadecenoic acid | Fatty Acids | Negative | C18H34O4 | 337.2344599 | 11.25145 |
| 72 | Monolinolenin (9c,12c,15c) | Fatty Acids | Negative | C21H36O4 | 353.267978 | 11.61426667 |
| 73 | Isoalantolactone | Phenylpropanoids | Negative | C15H20O2 | 233.1533054 | 11.65993333 |
| 74 | Chlorogenic acid | Phenylpropionate glycosides | Negative | C16H18O9 | 377.0841541 | 2.089266667 |
| 75 | 7,8-Dihydroxy-4-methylcoumarin | coumarin | Negative | C10H8O4 | 175.03822 | 2.24825 |
| 76 | 3-Indoleacrylic acid | Alkaloid | Negative | C11H9NO2 | 188.0705306 | 2.29375 |
| 77 | 8-Epiloganic acid | Iridoid glycosides | Negative | C16H24O10 | 359.1335024 | 2.429416667 |
| 78 | Kynurenic acid | Alkaloid | Negative | C10H7NO3 | 190.0499329 | 2.611066667 |
| 79 | 1-Naphthalenamine | Alkaloids | Negative | C10H9N | 144.0804438 | 3.287866667 |
| 80 | 2'-Hydroxy-6'-methoxyacetophenone | Phenylpropanoids | Negative | C9H10O3 | 167.0699394 | 3.354866667 |
| 81 | Ethyl 2,4-dihydroxy-6-methylbenzoate | Phenylpropanoids | Negative | C10H12O4 | 197.0807607 | 3.377033333 |
| 82 | Syringic acid | Phenylpropanoids | Negative | C9H10O5 | 199.0596151 | 3.512183333 |
| 83 | Isopropyl 4-hydroxybenzoate | Phenylpropanoids | Negative | C10H12O3 | 163.0747706 | 3.649183333 |
| 84 | (-)-Riboflavin | Vitamins | Negative | C17H20N4O6 | 377.1454914 | 3.83085 |
| 85 | Vicenin 2 | Protein | Negative | C27H30O15 | 617.146222 | 3.87585 |
| 86 | Norharmane | Alkaloid | Negative | C11H8N2 | 169.0758764 | 3.898333333 |
| 87 | Luteolin 7-glucoside | Flavonoid glycosides | Negative | C21H20O11 | 449.1068895 | 4.0565 |
| 88 | Loganin | Iridoid glycosides | Negative | C17H26O10 | 413.1414202 | 4.124 |
| 89 | 2-(1',2',3',4'-Tetrahydroxybutyl)quinoxaline | Alkaloid | Negative | C12H14N2O4 | 251.1032418 | 4.283983333 |
| 90 | Syringaldehyde | Phenylpropanoids | Negative | C9H10O4 | 183.0653081 | 4.6453 |
| 91 | Isoscoparin | Flavonoid glycosides | Negative | C22H22O11 | 463.1231927 | 4.668133333 |
| 92 | 2-Pentylfuran | Furan | Negative | C9H14O | 121.1006853 | 4.7138 |
| 93 | cis-Pinonic acid |  | Negative | C10H16O3 | 207.0993482 | 4.7138 |
| 94 | Carthamidin | Flavonoids | Negative | C15H12O6 | 289.0704676 | 5.209766667 |
| 95 | 3,5,7,2',6'-Pentahydroxyflavone 2'-glucoside | Flavonoid glycosides | Negative | C21H20O12 | 465.1016231 | 5.300266667 |
| 96 | Skimmin | coumarin | Negative | C15H16O8 | 325.0916977 | 5.435083333 |
| 97 | Luteolin-4'-O-glucoside | Flavonoid glycosides | Negative | C21H20O11 | 431.09543 | 5.457583333 |
| 98 | Syringetin 3-glucoside | Flavonoid glycosides | Negative | C23H24O13 | 509.1281567 | 5.502583333 |
| 99 | Lonicerin | Flavonoid glycosides | Negative | C27H30O15 | 595.1648031 | 5.524916667 |
| 100 | Aurantio-obtusin beta-D-glucoside | Anthraquinone glycosides | Negative | C23H24O12 | 493.1331039 | 5.884733333 |
| 101 | Isorhamnetin 3-O-glucoside | Flavonoid glycosides | Negative | C22H22O12 | 479.1171069 | 5.974733333 |
| 102 | Naringenin-7-O-glucoside | Flavonoid glycosides | Negative | C21H22O10 | 435.1274082 | 6.020066667 |
| 103 | Genistin | Flavonoid glycosides | Negative | C21H20O10 | 433.112054 | 6.042566667 |
| 104 | Diosmin | Flavonoid glycosides | Negative | C28H32O15 | 609.1801895 | 6.1324 |
| 105 | Isochlorogenic acid b | Coffee tannin | Negative | C25H24O12 | 517.1330057 | 6.154716667 |
| 106 | Azelaic acid | Fatty Acids | Negative | C9H16O4 | 171.1010663 | 6.22255 |
| 107 | Iridin | Flavonoid glycosides | Negative | C24H26O13 | 523.1438851 | 6.22255 |
| 108 | (E)-Aldosecologanin | Iridoid derivative glycosides | Negative | C34H46O19 | 781.2517804 | 6.22255 |
| 109 | Kaempferol 7-O-glucoside | Flavonoid glycosides | Negative | C21H20O11 | 449.1074358 | 6.267716667 |
| 110 | Hispidulin 7-O-beta-glucoside | Flavonoid glycosides | Negative | C22H22O11 | 463.1225819 | 6.358383333 |
| 111 | Matairesinoside | Lignan Glycosides | Negative | C26H32O11 | 543.182887 | 6.4937 |
| 112 | Scutellarein | Flavonoids | Negative | C15H10O6 | 287.0546325 | 6.5162 |
| 113 | Isoliquiritin | Lignan Glycosides | Negative | C21H22O9 | 419.1337867 | 6.607533333 |
| 114 | 3',4',5,7-Tetrahydroxy-3,6,8-trimethoxyflavone | Flavonoids | Negative | C18H16O9 | 377.085744 | 6.697866667 |
| 115 | 5,2',6'-Trihydroxy-7,8-dimethoxyflavone 2'-glucuronide | Flavonoid glycosides | Negative | C23H22O13 | 507.1121003 | 6.697866667 |
| 116 | Ononin | Flavonoid glycosides | Negative | C22H22O9 | 453.1144884 | 6.787016667 |
| 117 | Chrysin 8-C-glucopyranoside | Flavonoid glycosides | Negative | C21H20O9 | 417.1173441 | 6.854683333 |
| 118 | Norcimifugin | Volatile oils | Negative | C15H16O6 | 293.1015958 | 6.94535 |
| 119 | (+)-Abscisic acid | Terpenoids | Negative | C15H20O4 | 287.1253433 | 7.035683333 |
| 120 | Arctiin | Phenylpropanoid Glycosides | Negative | C27H34O11 | 535.2131872 | 7.035683333 |
| 121 | Luteolin | Flavonoids | Negative | C15H10O6 | 287.0550059 | 7.081333333 |
| 122 | 5-O-Methylvisamminol | Flavonoids | Negative | C16H18O5 | 291.1226258 | 7.126 |
| 123 | Wogonin 5-glucoside | Flavonoid glycosides | Negative | C22H22O10 | 447.1273723 | 7.373316667 |
| 124 | Gabapentin related compound D | Alkaloids | Negative | C18H29NO3 | 308.221853 | 7.689966667 |
| 125 | Tricin | Flavonoids | Negative | C17H14O7 | 331.0806892 | 7.7353 |
| 126 | Aloenin | Anthraquinone glycosides | Negative | C19H22O10 | 433.1118262 | 7.779966667 |
| 127 | Wogonoside | Flavonoid glycosides | Negative | C22H20O11 | 461.1067901 | 7.779966667 |
| 128 | Psoralen | Coumarin | Negative | C11H6O3 | 187.0390096 | 7.8023 |
| 129 | Matairesinol | Lignan | Negative | C20H22O6 | 341.1381196 | 8.18545 |
| 130 | 3-Hydroxy-3',4',5'-trimethoxyflavone | Flavonoids | Negative | C18H16O6 | 329.1016176 | 8.25295 |
| 131 | 5,2'-Dihydroxy-7,8,6'-trimethoxyflavone 2'-glucuronide | Flavonoid glycosides | Negative | C24H24O13 | 521.127314 | 8.3886 |
| 132 | Baicalein | Flavonoids | Negative | C15H10O5 | 271.0597489 | 8.681433333 |
| 133 | Liquiritigenin | Flavonoids | Negative | C15H12O4 | 257.0803398 | 8.726916667 |
| 134 | Demethylnobiletin | Flavonoids | Negative | C20H20O8 | 389.1217696 | 8.726916667 |
| 135 | Gardenin B | Flavonoids | Negative | C19H18O7 | 359.1125297 | 8.79475 |
| 136 | 5-Methoxypsoralen | coumarin类 | Negative | C12H8O4 | 217.0493677 | 8.817416667 |
| 137 | Isosinensetin | Flavonoids | Negative | C20H20O7 | 373.1275362 | 8.817416667 |
| 138 | Corchorifatty acid B | Fatty Acids | Negative | C18H28O4 | 309.2054696 | 8.88475 |
| 139 | Formononetin | Flavonoids | Negative | C16H12O4 | 269.0803429 | 8.99725 |
| 140 | 6''-O-Acetylglycitin | Flavonoid glycosides | Negative | C24H24O11 | 489.1376043 | 9.1549 |
| 141 | 4',5,7-Trihydroxy 3,3',6,8-tetramethoxyflavone | Flavonoids | Negative | C19H18O9 | 391.1014937 | 9.2449 |
| 142 | 5,6,7,3',4'-Pentamethoxyflavone | Flavonoids | Negative | C20H20O7 | 373.1273654 | 9.312383333 |
| 143 | 5,3'-Dihydroxy-6,7,4'-trimethoxyflavone | Flavonoids | Negative | C18H16O7 | 345.0969414 | 9.379883333 |
| 144 | 4',5,7,8-Tetramethoxyflavone | Flavonoids | Negative | C19H18O6 | 343.1172346 | 9.402216667 |
| 145 | Tricin methyl ether | Flavonoids | Negative | C18H16O7 | 345.0963407 | 9.650866667 |
| 146 | 3',4',5',5,6,7-Hexamethoxyflavone | Flavonoids | Negative | C21H22O8 | 403.1378577 | 9.673366667 |
| 147 | Wogonin | Flavonoids | Negative | C16H12O5 | 307.05731 | 9.740866667 |
| 148 | Chrysin | Flavonoids | Negative | C15H10O4 | 255.0650007 | 9.8087 |
| 149 | Casticin | Flavonoids | Negative | C19H18O8 | 375.1065902 | 9.943516667 |
| 150 | (+)-Pinoresinol | Lignan | Positive | C20H22O6 | 357.1336144 | 8.164183333 |
| 151 | 20-Carboxyarachidonic acid | Fatty Acids | Positive | C20H30O4 | 333.2064372 | 10.14858333 |
| 152 | 3-(4-Hydroxyphenyl)propionic acid | Phenylpropionic acids | Positive | C9H10O3 | 165.0558375 | 2.51715 |
| 153 | 3,5-Dicaffeoylquinic acid | Coffee tannin | Positive | C25H24O12 | 515.1199423 | 5.71215 |
| 154 | Apigenin 7-glucoside | Flavonoid glycosides | Positive | C21H20O10 | 477.1034624 | 6.071633333 |
| 155 | Datiscetin | Flavonoids | Positive | C15H10O6 | 285.0403907 | 7.57755 |
| 156 | Didymin | Flavonoid glycosides | Positive | C28H34O14 | 639.1929117 | 7.329733333 |
| 157 | DL-Malic acid | Organic acid | Positive | C4H6O5 | 133.0140693 | 0.682566667 |
| 158 | Forsythiaside | Caffeic acyl phenylethanol glycoside | Positive | C29H36O15 | 623.1975815 | 5.128516667 |
| 159 | Forsythoside E | Caffeic acyl phenylethanol glycoside | Positive | C20H30O12 | 461.1654464 | 2.539483333 |
| 160 | Icariside F2 | Glycosides | Positive | C18H26O10 | 447.150016 | 3.664416667 |
| 161 | Icaritin | Flavonoids | Positive | C21H20O6 | 367.1180527 | 10.26191667 |
| 162 | Liquiritin | Flavonoid glycosides | Positive | C21H22O9 | 417.1183564 | 5.217833333 |
| 163 | Loganic acid | Monoterpene | Positive | C16H24O10 | 357.1185094 | 2.629466667 |
| 164 | Methylmalonic acid | Fatty Acids | Positive | C4H6O4 | 117.0190649 | 0.9289 |
| 165 | Morroniside | Iridoid glycosides | Positive | C17H26O11 | 451.1447465 | 2.899466667 |
| 166 | Phillyrin | Dicycloxylignan Glycosides | Positive | C27H34O11 | 579.2080049 | 7.150566667 |
| 167 | Pinoresinol O-beta-D-glucopyranoside | Phenylpropanoid oxyglycoside | Positive | C26H32O11 | 519.1863209 | 5.913466667 |
| 168 | Plantamajoside | Lignin Glycosides | Positive | C29H36O16 | 639.193031 | 4.29555 |
| 169 | Pratensein | Flavonoids | Positive | C16H12O6 | 299.0556858 | 8.570833333 |
| 170 | Rengyolone | Flavonoids | Positive | C8H10O3 | 135.0449522 | 3.19095 |
| 171 | Salidroside | Phenylpropanoid Glycosides | Positive | C14H20O7 | 345.1187519 | 2.403483333 |
| 172 | Schaftoside | Flavonoid glycosides | Positive | C26H28O14 | 563.1402501 | 4.43055 |
| 173 | Scutellarin methyl ester | Flavonoid glycosides | Positive | NA | 475.0872661 | 7.57755 |
| 174 | trans-2-Hydroxycinnamic acid | Fatty Acids | Positive | C9H8O3 | 163.0401057 | 4.250716667 |
| 175 | D-(+)-Raffinose | Sugar | Positive | C18H32O16 | 549.1666712 | 0.59275 |
| 176 | D-Arabinonic acid | Sugar | Positive | C5H10O6 | 165.0403971 | 0.615083333 |
| 177 | Citric acid | Organic acid | Positive | C6H8O7 | 191.0199357 | 0.682566667 |
| 178 | D-Gluconic acid | Monosaccharide | Positive | C6H12O7 | 177.0402035 | 0.861233333 |
| 179 | (-)-Quinic acid | Fatty Acids | Positive | C7H12O6 | 237.0618725 | 0.883566667 |
| 180 | Cornoside | Benzoquinone Glycosides | Positive | C14H20O8 | 315.106959 | 1.451366667 |
| 181 | 10-Hydroxydecanoic acid | Fatty Acids | Positive | C10H20O3 | 187.1340078 | 10.10341667 |
| 182 | Eupatilin | Flavonoids | Positive | C18H16O7 | 343.0817096 | 10.26191667 |
| 183 | Semilicoisoflavone B | Flavonoids | Positive | C20H16O6 | 351.0869416 | 10.2844 |
| 184 | 12,13-Dihydroxy-9Z-octadecenoic acid | Fatty Acids | Positive | C18H34O4 | 313.2374607 | 11.0722 |
| 185 | Rotundifolioside G | Triterpene saponin | Positive | C47H76O18 | 909.4859724 | 11.18536667 |
| 186 | Methyl hexadecanoate | Saturated fatty acids | Positive | C17H34O2 | 315.2537579 | 11.658 |
| 187 | Secoxyloganin | Monoterpene Glycosides | Positive | C17H24O11 | 385.1134349 | 1.996833333 |
| 188 | Esculin | coumarin | Positive | C15H16O9 | 339.0714485 | 2.357483333 |
| 189 | 2-Isopropylmalic acid | Organic acid | Positive | C7H12O5 | 175.0610798 | 2.855466667 |
| 190 | Forsythide | Iridoid glycosides | Positive | C16H22O11 | 389.1082928 | 3.101116667 |
| 191 | Esculetin | coumarin | Positive | C9H6O4 | 223.0255732 | 3.168283333 |
| 192 | 4-Hydroxybenzaldehyde | Benzaldehyde | Positive | C7H6O2 | 121.0294161 | 3.482933333 |
| 193 | Corilagin | Tannin | Positive | C27H22O18 | 633.0735458 | 3.482933333 |
| 194 | (.+/-.)-2-Hydroxyisocaproic acid | Organic acid | Positive | C6H12O3 | 113.0605335 | 3.957066667 |
| 195 | Indican | Alkaloid | Positive | C14H17NO6 | 340.1031509 | 4.024566667 |
| 196 | Nepetin 7-glucoside | Flavonoid glycosides | Positive | C22H22O12 | 477.1036076 | 4.38555 |
| 197 | Pinoresinol diglucoside | Lignan glycoside | Positive | C32H42O16 | 727.2457716 | 4.38555 |
| 198 | N-Acetyl-L-phenylalanine | Amino acid | Positive | C11H13NO3 | 206.0821464 | 4.609866667 |
| 199 | Suberic acid | Fatty Acids | Positive | C8H14O4 | 173.0818274 | 4.858516667 |
| 200 | Ellagic acid | Phenols | Positive | C14H6O8 | 301.0011763 | 4.858516667 |
| 201 | 2-Hydroxyoctanoic acid | Fatty Acids | Positive | C8H16O3 | 159.1017076 | 5.084016667 |
| 202 | Isovitexin | Flavonoids | Positive | C21H20O10 | 431.0975456 | 5.172666667 |
| 203 | Violanthin | Flavonoid glycosides | Positive | C27H30O14 | 577.1554563 | 5.172666667 |
| 204 | Isoverbascoside | Phenylpropanoid Glycosides | Positive | C29H36O15 | 623.1975966 | 5.868466667 |
| 205 | 4-Hydroxybenzoic acid | Benzoic acids | Positive | C7H6O3 | 137.0242249 | 6.0263 |
| 206 | Neoisoliquiritin | Lignan glycoside | Positive | C21H22O9 | 463.1231717 | 6.453266667 |
| 207 | Tamarixetin | Flavonoids | Positive | C16H12O7 | 315.0505214 | 6.92525 |
| 208 | 2-cis-4-trans-Abscisic acid | Sesquiterpenoids | Positive | C15H20O4 | 263.1283879 | 7.060916667 |
| 209 | Quercetin | Flavonols | Positive | C15H10O7 | 301.034905 | 7.0834 |
| 210 | 6-Methoxyluteolin | Flavonoids | Positive | C16H12O7 | 315.0504681 | 7.329733333 |
| 211 | Dihydronorwogonin 7-O-glucuronide | Flavonoid glycosides | Positive | C21H20O11 | 429.0816221 | 7.4419 |
| 212 | Coumestrol | coumarin | Positive | C15H8O5 | 267.0295446 | 7.532216667 |
| 213 | trans-Traumatic acid | Fatty Acids | Positive | C12H20O4 | 227.1288151 | 8.005533333 |
| 214 | Undecanedioic acid | Fatty Acids | Positive | C11H20O4 | 215.1288351 | 8.277683333 |
| 215 | Hesperetin | Flavonoids | Positive | C16H14O6 | 301.0714869 | 8.300183333 |
| 216 | 3,6,3'-Trihydroxyflavone | Flavonoids | Positive | C15H10O5 | 269.0453081 | 8.345016667 |
| 217 | 4',5,7-Trihydroxy 3,6,8-trimethoxyflavone | Flavonoids | Positive | C18H16O8 | 359.0765721 | 8.97565 |
| 218 | Saikosaponin C | Triterpene saponin | Positive | C48H78O17 | 971.5233768 | 9.1793 |
| 219 | Topazolin | Flavonoids | Positive | C21H20O6 | 367.1178763 | 9.562116667 |
| 220 | Chrysosplenetin | Flavonoids | Positive | C19H18O8 | 373.0921297 | 9.945933333 |

**Supplementary Table S2**

| **Compounds of Xiaoer Fengreqing ingested into the blood obtained by integrating the results of UHPLC-QTOF-MS** | | | | | |
| --- | --- | --- | --- | --- | --- |
| **Num** | **Name** | **Category** | **Ionic mode** | **Molecular formula** | **Molecular weight** |
| 1 | 18.beta.-Glycyrrhetinic acid | Terpenoids | Negative | C30H46O4 | 453.3352003 |
| 2 | 3,3',4'-Trimethoxyflavone | Flavonoids | Negative | C18H16O5 | 313.1068372 |
| 3 | 3,4-Dihydroxybenzaldehyde | Benzaldehyde | Negative | C7H6O3 | 139.0385657 |
| 4 | 3,4-Dimethoxybenzoic acid | Benzoic acids | Negative | C9H10O4 | 165.0540541 |
| 5 | 3,7-Dihydroxy-3',4'-dimethoxyflavone | Flavonoids | Negative | C17H14O6 | 315.0860071 |
| 6 | 4'-O-.beta.-D-Glucosyl-5-O-methylvisamminol | Glycosides | Negative | C22H28O10 | 453.174244 |
| 7 | 5,7-Dihydroxy-8,2'-dimethoxyflavone 7-glucuronide | Flavonoid glycosides | Negative | C23H22O12 | 491.1173405 |
| 8 | Acteoside | Phenylpropanoid Glycosides | Negative | C29H36O15 | 647.193449 |
| 9 | Albiflorin | Glycosides | Negative | C23H28O11 | 481.1696821 |
| 10 | Arctigenin | Lignin | Negative | C21H24O6 | 355.1535261 |
| 11 | Baicalein 6-methyl ether 7-glucuronide | Flavonoid glycosides | Negative | C22H20O11 | 461.1069458 |
| 12 | Baicalin | Flavonoid glycosides | Negative | C21H18O11 | 447.0923791 |
| 13 | Baicalin methyl ester | Flavonoid glycosides | Negative | C22H20O11 | 461.1068834 |
| 14 | Caffeic acid | Phenylpropionic acids | Negative | C9H8O4 | 163.0386261 |
| 15 | Chrysin 6-C-glucoside-8-C-alpha-L-arabinopyranoside | Flavonoid glycosides | Negative | C26H28O13 | 549.1594771 |
| 16 | Cimifugin | Chromogenic ketones | Negative | C16H18O6 | 307.1173439 |
| 17 | Cynarin | Caffeioyl Quinic Acids | Negative | C25H24O12 | 499.1226769 |
| 18 | Dihydronorwogonin | Flavonoids | Negative | C15H12O5 | 273.0754294 |
| 19 | Diosmetin | Flavonoids | Negative | C16H12O6 | 301.0704622 |
| 20 | Genipin | Terpenoids | Negative | C11H14O5 | 209.0806809 |
| 21 | Geniposide | Iridoid glycosides | Negative | C17H24O10 | 411.1260419 |
| 22 | Glycyrrhizic acid | Triterpene saponin | Negative | C42H62O16 | 823.4094348 |
| 23 | Hesperidin | Flavonoid glycosides | Negative | C28H34O15 | 611.1960132 |
| 24 | Hispidulin 7-O-beta-glucuronide | Flavonoid glycosides | Negative | C22H20O12 | 477.1018432 |
| 25 | Hyperoside | Flavonol glycosides | Negative | C21H20O12 | 465.1016442 |
| 26 | Isoorientin | Flavonoids | Negative | C21H20O11 | 449.1071152 |
| 27 | Isosakuranetin | Flavonoids | Negative | C16H14O5 | 287.0907085 |
| 28 | Linarin | Flavonoid glycosides | Negative | C28H32O14 | 593.1853002 |
| 29 | Naringenin-4'-O-.beta.-D-glucuronide | Flavonoid glycosides | Negative | C21H20O11 | 449.1065333 |
| 30 | Nobiletin | Flavonoids | Negative | C21H22O8 | 403.1378717 |
| 31 | Oleoside 11-methyl ester | Phenylpropanoids | Negative | C17H24O11 | 427.1204447 |
| 32 | Oroxylin A | Flavonoids | Negative | C16H12O5 | 285.0755268 |
| 33 | p-Coumaric acid | coumarin | Negative | C9H8O3 | 147.0435355 |
| 34 | Pectolinarigenin | Flavonoids | Negative | C17H14O6 | 315.086028 |
| 35 | Poncirin | Flavonoid glycosides | Negative | C28H34O14 | 595.2004608 |
| 36 | prim-O-Glucosylcimifugin | Flavonoid glycosides | Negative | C22H28O11 | 469.1699234 |
| 37 | Rutin | Flavonoids | Negative | C27H30O16 | 611.1597733 |
| 38 | Saikosaponin D | Triterpene saponin | Negative | C42H68O13 | 803.453259 |
| 39 | Scutellarein tetramethyl ether | Flavonoids | Negative | C19H18O6 | 343.1171959 |
| 40 | Scutellarin | Flavonoid glycosides | Negative | C21H18O12 | 463.0864293 |
| 41 | sec-O-Glucosylhamaudol | Flavonoid glycosides | Negative | C21H26O10 | 439.159272 |
| 42 | Stachydrine | Alkaloid | Negative | C7H13NO2 | 144.101556 |
| 43 | Suspensaside | Caffeic acyl phenylethanol glycoside | Negative | C29H36O16 | 663.1887847 |
| 44 | Sweroside | Iridoid glycosides | Negative | C16H22O9 | 359.1335781 |
| 45 | Tachiogroside B |  | Negative | C18H24O12 | 433.1334213 |
| 46 | Tectorigenin | Flavonoids | Negative | C16H12O6 | 301.0704275 |
| 47 | Trigonelline | Alkaloid | Negative | C7H7NO2 | 138.0545597 |
| 48 | DL-Arginine | Amino acid | Negative | C6H14N4O2 | 175.1187053 |
| 49 | Sucrose | Sugar | Negative | C12H22O11 | 365.1051896 |
| 50 | Adenine | Amino acid | Negative | C5H5N5 | 136.0616234 |
| 51 | Synephrine | Alkaloid | Negative | C9H13NO2 | 150.0909641 |
| 52 | Adenosine | Azosides | Negative | C10H13N5O4 | 268.1042109 |
| 53 | Phenylacetaldehyde | Aldehyde | Negative | C8H8O | 121.0643385 |
| 54 | L-Phenylalanine | Amino acid | Negative | C9H11NO2 | 166.085857 |
| 55 | Tangeritin | Flavonoids | Negative | C20H20O7 | 373.1276109 |
| 56 | Stearidonic acid | Fatty Acids | Negative | C18H28O2 | 277.2157333 |
| 57 | 3-Hydroxy-3',4'-dimethoxyflavone | Flavonoids | Negative | C17H14O5 | 299.0908399 |
| 58 | Isoalantolactone | Phenylpropanoids | Negative | C15H20O2 | 233.1533054 |
| 59 | Chlorogenic acid | Phenylpropionate glycosides | Negative | C16H18O9 | 377.0841541 |
| 60 | 3-Indoleacrylic acid | Alkaloid | Negative | C11H9NO2 | 188.0705306 |
| 61 | 1-Naphthalenamine | Alkaloid | Negative | C10H9N | 144.0804438 |
| 62 | Ethyl 2,4-dihydroxy-6-methylbenzoate | Phenylpropanoids | Negative | C10H12O4 | 197.0807607 |
| 63 | Syringic acid | Phenylpropanoids | Negative | C9H10O5 | 199.0596151 |
| 64 | (-)-Riboflavin | Vitamins | Negative | C17H20N4O6 | 377.1454914 |
| 65 | Norharmane | Alkaloid | Negative | C11H8N2 | 169.0758764 |
| 66 | Luteolin 7-glucoside | Flavonoid glycosides | Negative | C21H20O11 | 449.1068895 |
| 67 | Loganin | Iridoid glycosides | Negative | C17H26O10 | 413.1414202 |
| 68 | Isoscoparin | Flavonoid glycosides | Negative | C22H22O11 | 463.1231927 |
| 69 | cis-Pinonic acid |  | Negative | C10H16O3 | 207.0993482 |
| 70 | 3,5,7,2',6'-Pentahydroxyflavone 2'-glucoside | Flavonoid glycosides | Negative | C21H20O12 | 465.1016231 |
| 71 | Syringetin 3-glucoside | Flavonoid glycosides | Negative | C23H24O13 | 509.1281567 |
| 72 | Lonicerin | Flavonoid glycosides | Negative | C27H30O15 | 595.1648031 |
| 73 | Isorhamnetin 3-O-glucoside | Flavonoid glycosides | Negative | C22H22O12 | 479.1171069 |
| 74 | Diosmin | Flavonoid glycosides | Negative | C28H32O15 | 609.1801895 |
| 75 | Isochlorogenic acid b | Coffee tannin | Negative | C25H24O12 | 517.1330057 |
| 76 | (E)-Aldosecologanin | Iridoid derivative glycosides | Negative | C34H46O19 | 781.2517804 |
| 77 | 5,2',6'-Trihydroxy-7,8-dimethoxyflavone 2'-glucuronide | Flavonoid glycosides | Negative | C23H22O13 | 507.1121003 |
| 78 | Chrysin 8-C-glucopyranoside | Flavonoid glycosides | Negative | C21H20O9 | 417.1173441 |
| 79 | Norcimifugin | Volatile oils | Negative | C15H16O6 | 293.1015958 |
| 80 | Arctiin | Phenylpropanoid Glycosides | Negative | C27H34O11 | 535.2131872 |
| 81 | Luteolin | Flavonoids | Negative | C15H10O6 | 287.0550059 |
| 82 | 5-O-Methylvisamminol | Flavonoids | Negative | C16H18O5 | 291.1226258 |
| 83 | Wogonin 5-glucoside | Flavonoid glycosides | Negative | C22H22O10 | 447.1273723 |
| 84 | Matairesinol | Lignan | Negative | C20H22O6 | 341.1381196 |
| 85 | Baicalein | Flavonoids | Negative | C15H10O5 | 271.0597489 |
| 86 | Corchorifatty acid B | Fatty Acids | Negative | C18H28O4 | 309.2054696 |
| 87 | Formononetin | Flavonoids | Negative | C16H12O4 | 269.0803429 |
| 88 | 6''-O-Acetylglycitin | Flavonoid glycosides | Negative | C24H24O11 | 489.1376043 |
| 89 | Tricin methyl ether | Flavonoids | Negative | C18H16O7 | 345.0963407 |
| 90 | Chrysin | Flavonoids | Negative | C15H10O4 | 255.0650007 |
| 91 | (+)-Pinoresinol | Lignan | Positive | C20H22O6 | 357.1336144 |
| 92 | 20-Carboxyarachidonic acid | Fatty Acids | Positive | C20H30O4 | 333.2064372 |
| 93 | 3-(4-Hydroxyphenyl)propionic acid | Phenylpropionic acids | Positive | C9H10O3 | 165.0558375 |
| 94 | 3,5-Dicaffeoylquinic acid | Coffee tannin | Positive | C25H24O12 | 515.1199423 |
| 95 | Apigenin 7-glucoside | Flavonoid glycosides | Positive | C21H20O10 | 477.1034624 |
| 96 | Datiscetin | Flavonoids | Positive | C15H10O6 | 285.0403907 |
| 97 | Didymin | Flavonoid glycosides | Positive | C28H34O14 | 639.1929117 |
| 98 | DL-Malic acid | Organic acid | Positive | C4H6O5 | 133.0140693 |
| 99 | Forsythiaside | Caffeic acyl phenylethanol glycoside | Positive | C29H36O15 | 623.1975815 |
| 100 | Forsythoside E | Caffeic acyl phenylethanol glycoside | Positive | C20H30O12 | 461.1654464 |
| 101 | Icariside F2 | Glycosides | Positive | C18H26O10 | 447.150016 |
| 102 | Icaritin | Flavonoids | Positive | C21H20O6 | 367.1180527 |
| 103 | Liquiritin | Flavonoid glycosides | Positive | C21H22O9 | 417.1183564 |
| 104 | Loganic acid | Monoterpene | Positive | C16H24O10 | 357.1185094 |
| 105 | Methylmalonic acid | Fatty Acids | Positive | C4H6O4 | 117.0190649 |
| 106 | Morroniside | Iridoid glycoside | Positive | C17H26O11 | 451.1447465 |
| 107 | Phillyrin | Phenylpropanoid oxyglycoside | Positive | C27H34O11 | 579.2080049 |
| 108 | Pinoresinol O-beta-D-glucopyranoside | Phenylpropanoid oxyglycoside | Positive | C26H32O11 | 519.1863209 |
| 109 | Plantamajoside | Glycosides | Positive | C29H36O16 | 639.193031 |
| 110 | Pratensein | Flavonoids | Positive | C16H12O6 | 299.0556858 |
| 111 | Halleridone | Flavonoids | Positive | C8H10O3 | 135.0449522 |
| 112 | Salidroside | Phenylpropanoid Glycosides | Positive | C14H20O7 | 345.1187519 |
| 113 | Schaftoside | Flavonoid glycosides | Positive | C26H28O14 | 563.1402501 |
| 114 | Scutellarin methyl ester | Flavonoid glycosides | Positive | NA | 475.0872661 |
| 115 | trans-2-Hydroxycinnamic acid | Fatty Acids | Positive | C9H8O3 | 163.0401057 |
| 116 | D-(+)-Raffinose | Sugar | Positive | C18H32O16 | 549.1666712 |
| 117 | D-Arabinonic acid | Sugar | Positive | C5H10O6 | 165.0403971 |
| 118 | Citric acid | Organic acid | Positive | C6H8O7 | 191.0199357 |
| 119 | Cornoside | Glycosides | Positive | C14H20O8 | 315.106959 |
| 120 | 12,13-Dihydroxy-9Z-octadecenoic acid | Fatty Acids | Positive | C18H34O4 | 313.2374607 |
| 121 | Esculin | coumarin | Positive | C15H16O9 | 339.0714485 |
| 122 | Forsythide | Caffeic acyl phenylethanol glycoside | Positive | C16H22O11 | 389.1082928 |
| 123 | (.+/-.)-2-Hydroxyisocaproic acid | Organic acid | Positive | C6H12O3 | 113.0605335 |
| 124 | Indican | Alkaloid | Positive | C14H17NO6 | 340.1031509 |
| 125 | Nepetin 7-glucoside | Flavonoid glycosides | Positive | C22H22O12 | 477.1036076 |
| 126 | Pinoresinol diglucoside | Lignan | Positive | C32H42O16 | 727.2457716 |
| 127 | 2-Hydroxyoctanoic acid | Fatty Acids | Positive | C8H16O3 | 159.1017076 |
| 128 | Isovitexin | Flavonoids | Positive | C21H20O10 | 431.0975456 |
| 129 | Violanthin | Flavonoid glycosides | Positive | C27H30O14 | 577.1554563 |
| 130 | Isoverbascoside | Phenylpropanoid Glycosides | Positive | C29H36O15 | 623.1975966 |
| 131 | 4-Hydroxybenzoic acid | Benzoic acids | Positive | C7H6O3 | 137.0242249 |
| 132 | 2-cis-4-trans-Abscisic acid | Terpenoids | Positive | C15H20O4 | 263.1283879 |
| 133 | Quercetin | Flavonols | Positive | C15H10O7 | 301.034905 |
| 134 | 6-[(5,8-Dihydroxy-4-oxo-2-phenyl-3,4-dihydro-2H-1-benzopyran-7-yl)oxy]-3,4,5-trihydroxyoxane-2-carboxylic acid | Flavonoid glycosides | Positive | C21H20O11 | 429.0816221 |
| 135 | Hesperetin | Flavonoids | Positive | C16H14O6 | 301.0714869 |
| 136 | 4H-1-BENZOPYRAN-4-ONE, 3,6-DIHYDROXY-2-(3-HYDROXYPHENYL)- | Flavonols | Positive | C15H10O5 | 269.0453081 |
| 137 | 4',5,7-Trihydroxy 3,6,8-trimethoxyflavone | Flavonoids | Positive | C18H16O8 | 359.0765721 |

**Supplementary Table S3**

| **The binding energy between ACE2 with compounds of XF ingested into the blood** | | | |
| --- | --- | --- | --- |
| **Num** | **Name** | **Molecular formula** | **BindingEnergy(ACE2)/(kJ/mol < -5)** |
| 1 | 3,4-Dihydroxybenzaldehyde | C7H6O3 | -3.88 |
| 2 | Acteoside | C29H36O15 | -2.48 |
| 3 | Albiflorin | C23H28O11 | -2.7 |
| 4 | Caffeic acid | C9H8O4 | -1.89 |
| 5 | Cynarin | C25H24O12 | -0.96 |
| 6 | Diosmetin | C16H12O6 | -5.8 |
| 7 | Geniposide | C17H24O10 | -2.41 |
| 8 | Hyperoside | C21H20O12 | -3.05 |
| 9 | Isosakuranetin | C16H14O5 | -6.05 |
| 10 | p-Coumaric acid | C9H8O3 | -3.95 |
| 11 | Poncirin | C28H34O14 | -3.08 |
| 12 | Saikosaponin D | C42H68O13 | -1.08 |
| 13 | sec-O-Glucosylhamaudol | C21H26O10 | -4.02 |
| 14 | Adenine | C5H5N5 | -3.83 |
| 15 | Chlorogenic acid | C16H18O9 | -4.01 |
| 16 | Syringic acid | C9H10O5 | -3.32 |
| 17 | Luteolin 7-glucoside | C21H20O11 | -3.55 |
| 18 | Loganin | C17H26O10 | -2.78 |
| 19 | 3,5,7,2',6'-Pentahydroxyflavone 2'-glucoside | C21H20O12 | -2.44 |
| 20 | Syringetin 3-glucoside | C23H24O13 | -3.22 |
| 21 | Isorhamnetin 3-O-glucoside | C22H22O12 | -3.9 |
| 22 | Isochlorogenic acid b | C25H24O12 | -2.87 |
| 23 | Chrysin 8-C-glucopyranoside | C21H20O9 | -3.27 |
| 24 | Luteolin | C15H10O6 | -5.97 |
| 25 | Wogonin 5-glucoside | C22H22O10 | -2.91 |
| 26 | 3-(4-Hydroxyphenyl)propionic acid | C9H10O3 | -4.02 |
| 27 | 3,5-Dicaffeoylquinic acid | C25H24O12 | -2.41 |
| 28 | Apigenin 7-glucoside | C21H20O10 | -3.44 |
| 29 | Datiscetin | C15H10O6 | -5.53 |
| 30 | Didymin | C28H34O14 | -2.2 |
| 31 | DL-Malic acid | C4H6O5 | -0.98 |
| 32 | Forsythiaside | C29H36O15 | -2.81 |
| 33 | Liquiritin | C21H22O9 | -5.52 |
| 34 | Loganic acid | C16H24O10 | -1.97 |
| 35 | Methylmalonic acid | C4H6O4 | -1.81 |
| 36 | Halleridone | C8H10O3 | -4.74 |
| 37 | trans-2-Hydroxycinnamic acid | C9H8O3 | -3.9 |
| 38 | Esculin | C15H16O9 | -3.98 |
| 39 | (.+/-.)-2-Hydroxyisocaproic acid | C6H12O3 | -2.95 |
| 40 | Indican | C14H17NO6 | -4.09 |
| 41 | Nepetin 7-glucoside | C22H22O12 | -3.5 |
| 42 | Isovitexin | C21H20O10 | -3.9 |
| 43 | Isoverbascoside | C29H36O15 | -1.49 |
| 44 | Quercetin | C15H10O7 | -4.39 |
| 45 | Dihydronorwogonin 7-O-glucuronide | C21H20O11 | -2.3 |
| 46 | 3,4-Dimethoxybenzoic acid | C9H10O4 | -3.37 |
| 47 | 4'-O-.beta.-D-Glucosyl-5-O-methylvisamminol | C22H28O10 | -4.32 |
| 48 | 5,7-Dihydroxy-8,2'-dimethoxyflavone 7-glucuronide | C23H22O12 | -3.47 |
| 49 | Arctigenin | C21H24O6 | -4.41 |
| 50 | Baicalein 6-methyl ether 7-glucuronide | C22H20O11 | -3.09 |
| 51 | Baicalin | C21H18O11 | -2.93 |
| 52 | Baicalin methyl ester | C22H20O11 | -5.05 |
| 53 | Chrysin 6-C-glucoside-8-C-alpha-L-arabinopyranoside | C26H28O13 | -2.84 |
| 54 | Cimifugin | C16H18O6 | -5.09 |
| 55 | Dihydronorwogonin | C15H12O5 | -5.99 |
| 56 | Hesperidin | C28H34O15 | -2.4 |
| 57 | Hispidulin 7-O-beta-glucuronide | C22H20O12 | -2.09 |
| 58 | Isoorientin | C21H20O11 | -3.13 |
| 59 | Linarin | C28H32O14 | -2.06 |
| 60 | Oleoside 11-methyl ester | C17H24O11 | -1.59 |
| 61 | Rutin | C27H30O16 | -0.31 |
| 62 | Suspensaside | C29H36O16 | -1.36 |
| 63 | Sweroside | C16H22O9 | -3.68 |
| 64 | Adenosine | C10H13N5O4 | -2.81 |
| 65 | Phenylacetaldehyde | C8H8O | -3.84 |
| 66 | 3-Hydroxy-3',4'-dimethoxyflavone | C17H14O5 | -4.74 |
| 67 | Isoalantolactone | C15H20O2 | -4.8 |
| 68 | Norharmane | C11H8N2 | -4.93 |
| 69 | Isoscoparin | C22H22O11 | -3.77 |
| 70 | Diosmin | C28H32O15 | -2.8 |
| 71 | 5,2',6'-Trihydroxy-7,8-dimethoxyflavone 2'-glucuronide | C23H22O13 | -3.81 |
| 72 | Arctiin | C21H24O6 | -3.27 |
| 73 | Baicalein | C15H10O5 | -5.81 |
| 74 | 6''-O-Acetylglycitin | C24H24O11 | -3.25 |
| 75 | Icaritin | C21H20O6 | -4.84 |
| 76 | Morroniside | C17H26O11 | -3.14 |
| 77 | Phillyrin | C27H34O11 | -3.56 |
| 78 | Pinoresinol O-beta-D-glucopyranoside | C26H32O11 | -3.45 |
| 79 | Plantamajoside | C29H36O16 | -2.14 |
| 80 | Salidroside | C14H20O7 | -3.43 |
| 81 | D-Arabinonic acid | C5H10O6 | -1.42 |
| 82 | 4-Hydroxybenzoic acid | C7H6O3 | -4.12 |
| 83 | 3,6,3'-Trihydroxyflavone | C15H10O5 | -6.04 |
| 84 | Genipin | C11H14O5 | -4.1 |
| 85 | Naringenin-4'-O-.beta.-D-glucuronide | C21H20O11 | -4.23 |
| 86 | Tachiogroside B | C18H24O12 | -0.38 |
| 87 | Trigonelline | C7H7NO2 | -3.88 |
| 88 | Synephrine | C9H13NO2 | -5.23 |
| 89 | 18.beta.-Glycyrrhetinic acid | C30H46O4 | -5.08 |
| 90 | Glycyrrhizic acid | C42H62O16 | 2.32 |
| 91 | prim-O-Glucosylcimifugin | C22H28O11 | -3.1 |
| 92 | 1-Naphthalenamine | C10H9N | -4.23 |
| 93 | Lonicerin | C27H30O15 | -3.11 |
| 94 | (E)-Aldosecologanin | C34H46O19 | 1.2 |
| 95 | Forsythoside E | C20H30O12 | -1.72 |
| 96 | Icariside F2 | C18H26O10 | -3 |
| 97 | Schaftoside | C26H28O14 | -2.27 |
| 98 | Scutellarin methyl ester | NA | -2.92 |
| 99 | Cornoside | C14H20O8 | -3.85 |
| 100 | Forsythide | C16H22O11 | -0.65 |
| 101 | Violanthin | C27H30O14 | -1.86 |
| 102 | Scutellarin | C21H18O12 | -2.18 |
| 103 | Stachydrine | C7H13NO2 | -3.66 |
| 104 | DL-Arginine | C6H14N4O2 | -5.25 |
| 105 | Sucrose | C12H22O11 | -0.47 |
| 106 | L-Phenylalanine | C9H11NO2 | -4.33 |
| 107 | 3-Indoleacrylic acid | C11H9NO2 | -4.36 |
| 108 | (-)-Riboflavin | C17H20N4O6 | -3.17 |
| 109 | Pinoresinol diglucoside | C32H42O16 | -3.4 |
| 110 | D-(+)-Raffinose | C18H32O16 | 1.2 |
| 111 | Citric acid | C6H8O7 | 0 |
